# Supplementary material for: Development of Asia Pacific Weather Statistics (APWS) dataset for use in Soil and Water Assessment Tool (SWAT) simulation
Source: Copernicus journal article supplement (doi:10.5194/essd-2019-178), 2019-11-07
Supplement: Supplementary file 1 [file essd-2019-178-supplement.pdf]

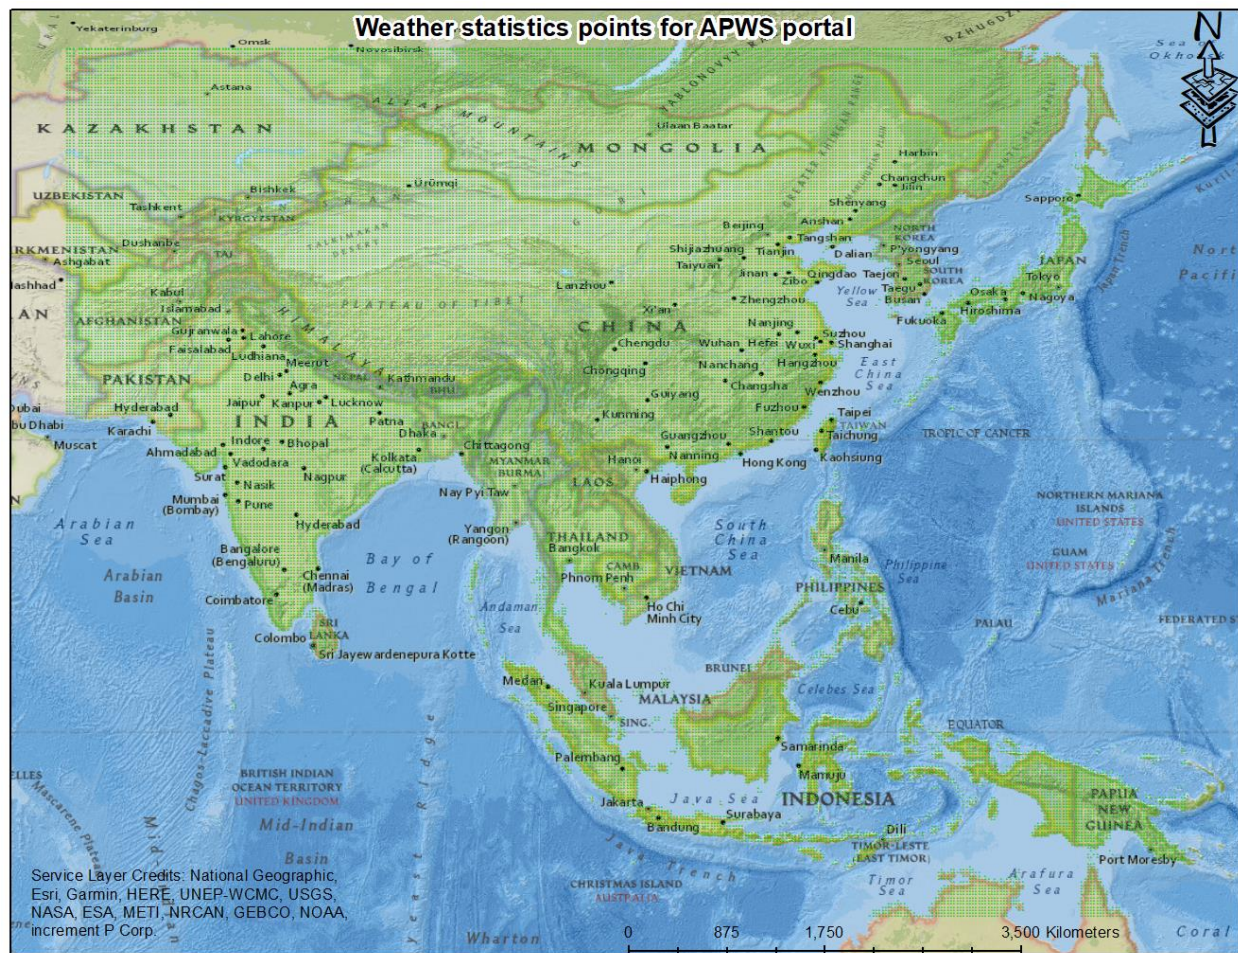

Fig. S1: APWS points across Asia Pacific

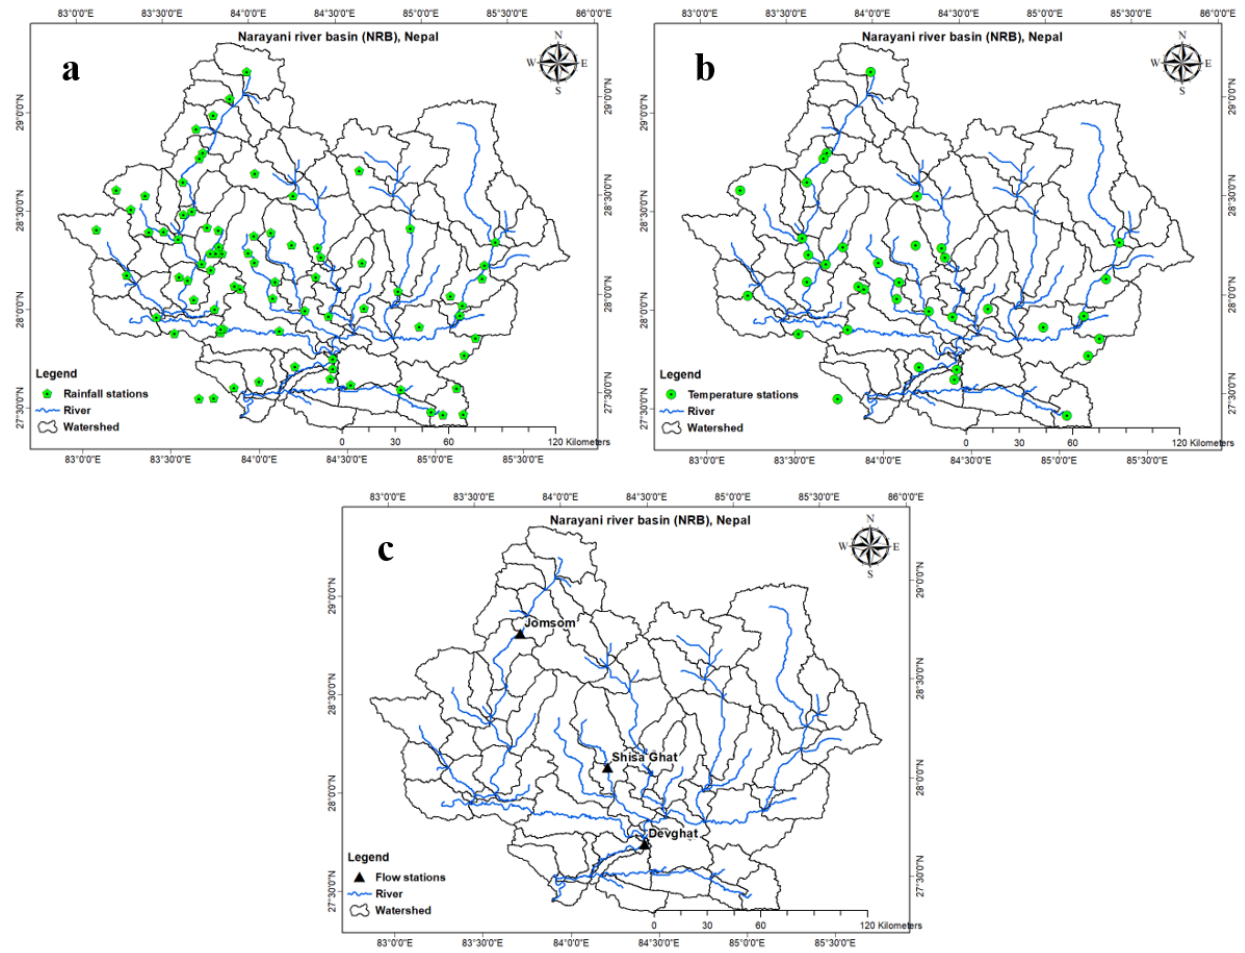

Fig. S2: Rainfall (a), temperature (b) and flow (c) stations located in Narayani river basin, Nepal

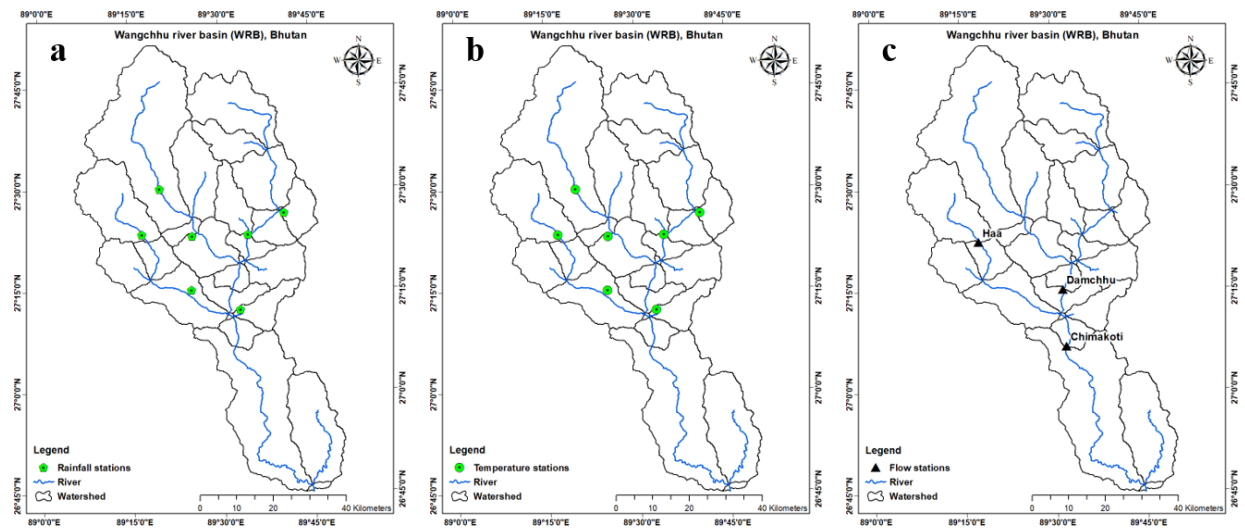

Fig. S3: Rainfall (a), temperature (b) and flow (c) stations located in Wangchhu river basin, Bhutan

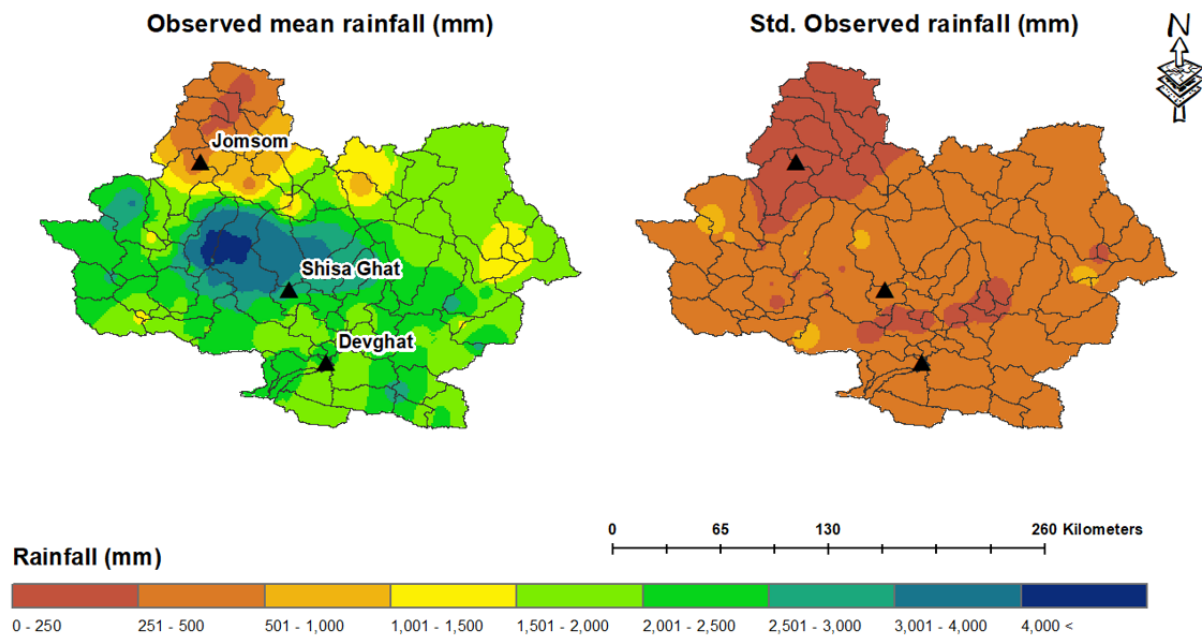

Fig. S4: Mean and standard deviation of observed rainfall in Narayani river basin

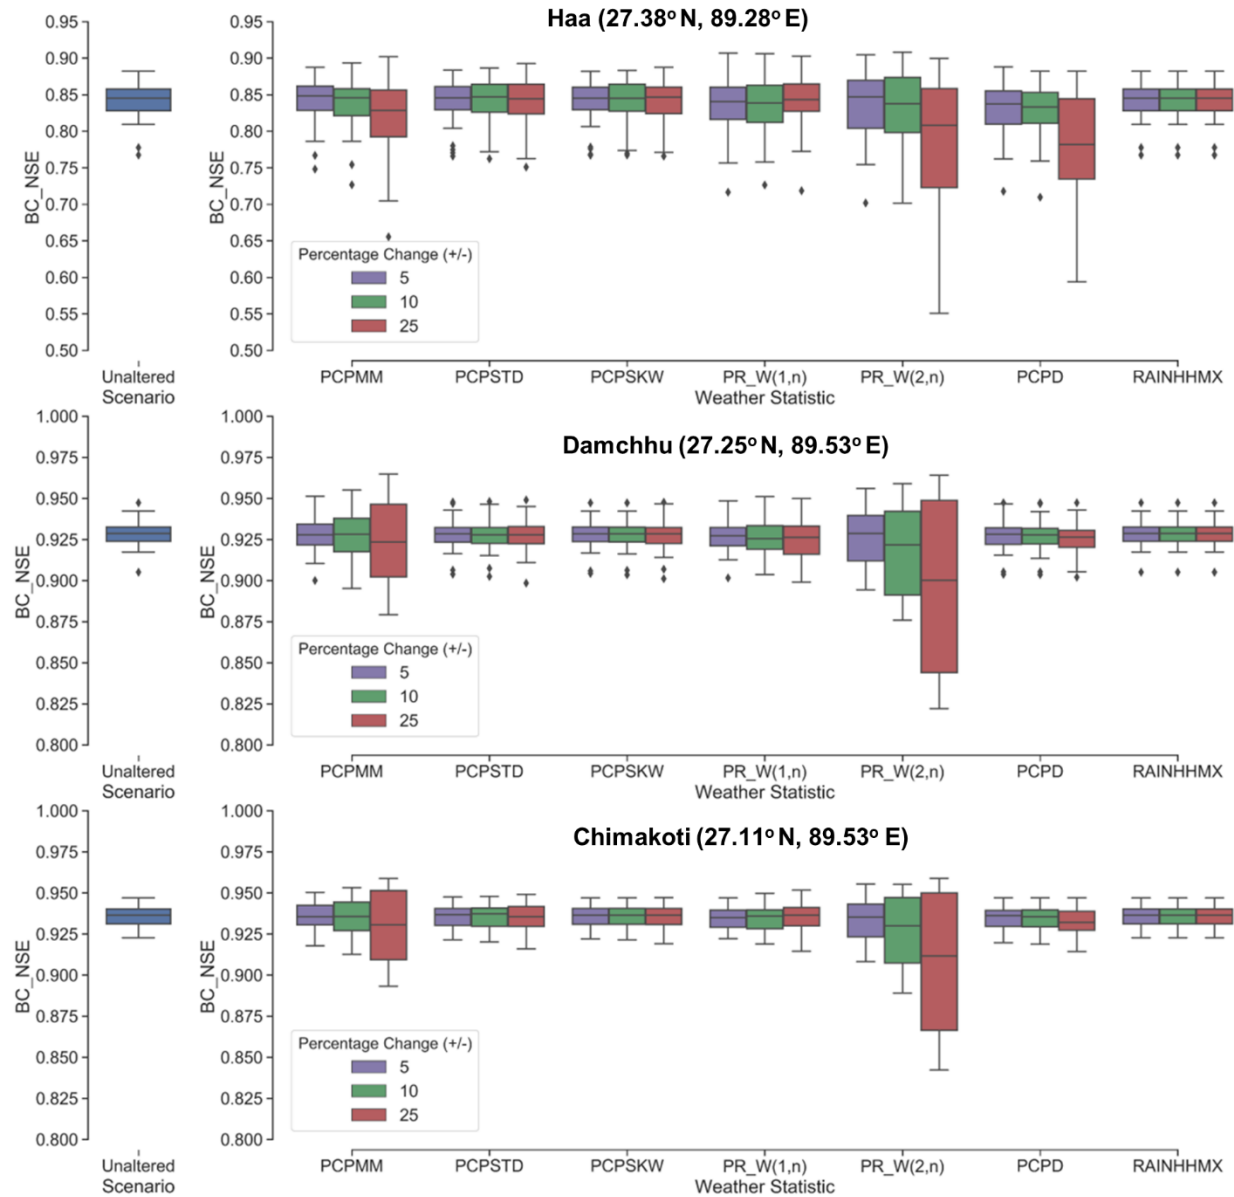

Fig. S5: Sensitivity analysis of weather statistics in terms of NSE in Wangchhu river basin, Bhutan
