# Supplementary material for: Development of Asia Pacific Weather Statistics (APWS) dataset for use in Soil and Water Assessment Tool (SWAT) simulation
Source: Copernicus journal article supplement (doi:10.5194/essd-2019-178), 2019-11-07
Supplement: Supplementary file [file essd-2019-178-AC3-supplement.pdf]

# Development of Asia Pacific Weather Statistics (APWS) dataset for use in Soil and Water Assessment Tool (SWAT) simulations

Uttam Ghimire, Taimoor Akhtar, Narayan Kumar Shrestha, Prasad Daggupati

College of Engineering and Physical Sciences, University of Guelph, Ontario, N1G2W1, Canada

5 Correspondence to Prasad Daggupati ([pdaggupa@uoguelph.ca](mailto:pdaggupa@uoguelph.ca)), +1-519-760-9299

## Abstract.

The application of Soil and Water Assessment Tool (SWAT) for hydrological modelling in Asia Pacific region is immense. However, a robust modelling practice is often constrained by limited amount and quality of weather data. In such conditions, SWAT uses an inherent statistical weather generator to generate synthetic series of weather inputs for which, long-term precise weather statistics are needed. This study presents a high-resolution Asia Pacific Weather Statistics (APWS) dataset in a format ready to be used in SWAT simulations.

The APWS dataset consists of rainfall statistics from Asian Highly Resolved Observational Data Integration Towards Evaluation of Water Resources (APHRODITE) project at 0.25° and remaining weather statistics from Climate Forecast System Reanalysis (CFSR) at 0.38°. The utility of APWS is evaluated by comparing its performance with established CFSR statistics and observed weather statistics (OBS) for daily flow simulation in two river basins of South Asia; Narayani in Nepal and Wangchhu in Bhutan. The comparison is done on different precipitation data availability scenarios, where for each scenario, a specified percentage of historical precipitation data is removed and replaced by synthetic precipitation data, generated by SWAT's inherent weather generator with weather statistics from i) OBS, ii) APWS and iii) CFSR independently.

Results indicate that performance of APWS is comparable to OBS and better than CFSR dataset in rainfall reconstruction for hydrologic modelling, especially in the smaller sub-basins. Sensitivity analysis indicates that simulated hydrologic response of SWAT is highly sensitive to rainfall-based weather statistics like probability of wet day following wet day, mean monthly rainfall and number of rainy days. Hence, the use of highly accurate rainfall statistics is important for hydrologic modelling in data-scarce scenarios. These findings illustrate that APWS is a valuable dataset contribution for hydrological modelling using SWAT in the Asia Pacific region, and is publicly available at <https://hydra-water.shinyapps.io/APWS/> or <http://doi.org/10.5281/zenodo.3460766> (Ghimire et al., 2019).

Keywords: Asia Pacific, SWAT, APHRODITE, CFSR, Weather generator statistic

## 1 Introduction

The Asia Pacific region has been identified for its challenges in observed meteorological data quality and the sparse network of stations (Page et al., 2004; Martin et al., 2015; WMO, 2017), which has hindered robust agro-hydro modeling and climate

30 risk assessments. In such data constrained regions, weather generators are potential options to generate synthetic series of rainfall, temperature, humidity, and solar radiation (Semenov and Barrow, 1997). Weather generators are expected to reproduce the spatiotemporal dynamics of observed weather variables, their variability and persistence in a distribution (Ailliot et al., 2015). Their applications have been reported for energy demands (Kolokotroni et al., 2012), crop management (Supit et al., 2012), climate risk assessment (Steinschneider and Brown, 2013; Srivastav and Simonovic, 2015), agricultural (Jones and Thornton, 2013) and hydrological modelling (Dile and Srinivasan, 2014), among many others.

Importance of weather generators in hydrological modeling is paramount in data sparse basins (Candela et al., 2012; Dile and Srinivasan, 2014), either to generate a new series of weather inputs (Eames et al., 2012; Caraway et al., 2014) or to fill the missing and dubious information (Aouissi et al., 2016; Lu et al., 2015) in measured data. Of the several hydrological models employing weather generator for such purposes, Soil and Water Assessment Tool (SWAT) (Arnold et al., 2012) is, arguably, 40 the most widely used. The application of SWAT for eco-hydrological modeling in Asia Pacific region has rapidly increased in last few years and is further likely to increase with the on-going developments in SWAT (Francesconi et al., 2016; Arnold et al., 2012).

SWAT uses the WXGN weather generator (Sharpley, 1990) to generate or fill weather information using user specified statistics of rainfall, temperature, solar radiation, wind speed and dew point temperature (Aouissi et al., 2016). The WXGN 45 weather generator is a statistical model that uses numerous core weather statistics (defined for each month) to generate synthetic weather data. Of the total 168 monthly weather statistics needed to run WXGN in SWAT, 84 pertain to rainfall, highlighting the importance of rainfall statistics in weather generation (Neitsch et al., 2011). WXGN (also sometimes referred as WGN or WGEN) primarily generates the probability of rainfall occurrence for a given day and its corresponding amount, followed by other weather variables like temperature and solar radiation depending on the rainfall status (Richardson, 50 1981; Richardson and Wright, 1984). Thus, it is imperative that precise rainfall statistics must be defined for effective weather generation and robust hydrological modeling in river basins, where rainfall is the primary component of hydrological cycle.

Currently, SWAT modelers have the option of manually providing weather statistics using observed weather data or using the publicly accessible Climate Forecast and System Reanalysis (CFSR) weather dataset (Saha et al., 2010), for hydrological simulation in basins located outside US (Neitsch et al., 2011). The SWAT development team has provided access to a few 55 platforms to manually estimate the required weather statistics, e.g., “WGN Parameters Estimation Tool” and “WGN Excel macro” (SWAT, 2019) etc. However, the amount of weather data required and the calculation procedures of the desired statistics, can be overwhelming for many SWAT modelers. Hence, most SWAT modelers prefer to use the already developed weather statistics CFSR dataset. CFSR dataset’s extensive use for SWAT modeling has already been seen in developing countries around the world (Alemayehu et al., 2015; Dile and Srinivasan, 2014; Monteiro et al., 2016; Worqlul et al., 60 2017; Daggupati et al., 2017).

However, CFSR has been reported with higher biases in its weather variables compared to other gridded reanalysis products like MERRA, GLDAS, NCEP and ERA in various locations of North Western hemisphere (Decker et al., 2012). Even in Asian regions, CFSR has shown inferior performance in hydrological simulation in Three Georges Reservoir basin, China (Yang et

al., 2014), Mekong region (Lauri et al., 2014), Srepok basin in Vietnam (Thom and Khoi, 2017), Maharlu lake in Iran (Eini et al., 2019), Langcang basin in China (Tang et al., 2019) and many others, compared to other rainfall products. The resolution of CFSR (0.38°) dataset could be another reason for its inferior performance in the topographically complex Asia Pacific region, as for each sub-basin, SWAT assigns the weather statistics from a nearby location defined within the dataset. As rainfall is the primary driver of hydrological models in majority of river basins of Asia, rainfall statistics defined from a location within 0.38° are likely to differ than that of sub-basin climatology and could yield deviations in reconstructing the rainfall and other weather series. Anders et al. (2006) reported that the rainfall differences within a 10 km spatial scale were as high as fivefold in the Himalayan region. Such significant variations in rainfall characteristics are likely to impact the generation of better weather sequences and their applications for impact assessments.

Ideally, long term (more than 10 years) observed rainfall records at daily time-step are needed to define accurate rainfall statistics for the entire Asia Pacific region for better weather generation (Neitsch et al., 2011). However, the Asia Pacific region is sparsely gaged and long-term continuous weather records (WMO, 2017) are not publicly and readily available for many gaged locations. The Asian Precipitation Highly Resolved Observational Data Integration Towards Evaluation (APHRODITE) gridded rainfall is a publicly available dataset that addresses the above-mentioned rainfall data availability challenge for the Asia Pacific region. APHRODITE is an interpolated product of thousands of surface rainfall stations from Asia Pacific countries and additional WMO Global Telecommunication Systems (Yatagai et al., 2012; Xie et al., 2007) that provides gridded rainfall data at a 0.25° spatial resolution (which is better than CFSR's 0.38° resolution). APHRODITE has been used in the Asia Pacific region as baseline rainfall series for drought analysis (Um et al., 2017; Sohn et al., 2012), climate model assessments (Khan et al., 2018; Cruz and Sasaki, 2017), climate change impact assessments (Apurv et al., 2015; Kulkarni et al., 2013) and hydrological model setup (Lauri et al., 2014; Panday et al., 2014). Moreover, APHRODITE's relative superiority over other rainfall products, including CFSR, is well-established in several countries in the Asia Pacific region, including Saudi Arabia (El Kenawy and McCabe, 2016), Greater Mekong (Chen et al., 2017), Bhutan (Awange and Forootan, 2016), China (Yang et al., 2014; Tang et al., 2019) and many others. The better performance of APHRODITE over CFSR and other products in the region suggests that rainfall statistics derived from APHRODITE data could be more precise, and hence, more effective in generating relatively accurate synthetic weather data and better flow simulations using SWAT in rainfall dominant basins of Asia.

Thus, the objective of this study is two pronged; (1) development of a robust weather statistics dataset for effective weather generation in river basins of Asia Pacific using APHRODITE rainfall to use in SWAT models and (2) evaluation of effectiveness of the proposed weather statistics dataset against [observed rainfall-based statistics dataset \(OBS\)](#) and the CFSR statistics dataset, in the context of synthetic weather generation and subsequent flow simulation in selected test basins. A high-resolution weather statistics dataset at 0.25° is generated (hereafter named APWS dataset, i.e., Asia Pacific Weather Statistics dataset) by combining rainfall statistics from APHRODITE and remaining weather statistics from nearest CFSR station at 0.38° spatial resolution and is made publicly accessible at <https://hydra-water.shinyapps.io/APWS/> or <http://doi.org/10.5281/zenodo.3460766> (Ghimire et al., 2019) in SWAT ready format. Two river basins, Narayani in Nepal

and Wangchhu in Bhutan are selected as test basins to compare the performance of APWS against [OBS and CFSR](#) dataset, in weather generation and flow simulation for different missing percentages of rainfall. [The presented APWS warrants originality, since no other such weather statistics datasets are publicly available \(that are designed for use within weather generators\), where precipitation statistics are derived from observed rainfall at 0.25-degree resolution for entire Asia Pacific region in a SWAT-readable format.](#)

## 2 The SWAT weather generator statistics data structure

SWAT is a semi-distributed hydrologic model that requires weather data input at the sub-basin level. Consequently, the weather generator embedded in SWAT (i.e., WXGN (Sharpley, 1990)) uses weather statistics inputs at the sub-basin level for generating synthetic weather data (if desired). Statistics for the weather generator are stored in SWAT's structured access database (i.e., SWAT2012.mdb for SWAT2012) Moreover, these statistics are stored for point locations (WXGN uses the nearest location's statistics to generate synthetic weather data, wherever required), and should be derived from long term (more than 10 years) weather data (Neitsch et al., 2011).

While a default weather statistics data set (derived from US\_First Order stations and US\_COOP) is included in SWAT's default database for the United States (US), SWAT modelers who are interested in developing models for basins outside the US, need to manually provide weather statistics parameters ([defined as OBS in this study](#)). These parameters, along with their description and their effect on weather generation using SWAT's WXGN weather generator are delineated in Table 1

*[Table 1 about here]*

## 3 The APWS Dataset

### 3.1 Need

The only data product that readily provides the weather statistics parameters (in SWAT-ready format) listed in Table 1, for point locations in the Asia Pacific region, is the CFSR weather dataset (SWAT, 2014). CFSR is a reanalysis data product (Saha et al., 2010). Reanalysis data are generated (even in hind-cast scenarios) by performing data assimilation for a past period using historically available data from surface stations, satellites and airships and a current numerical weather prediction (NWP) model. For any pre-defined forecast (a hind-cast is used for generating weather statistics from CFSR) time period, NWP uses historical data (of the starting time of the hind-cast / forecast) as initial boundary condition of the atmosphere and generates the next first guess forecast (which for generating SWAT weather statistics, is a hind-cast) based on theoretical approximations of atmosphere and relationship between different parameters (Parker, 2016). Consequently, accuracy of reanalysis-based hindcast datasets relies heavily on calibration of algorithms that represent the state of atmosphere. Given there is high uncertainty associated with the calibration of such algorithms, hindcast results of reanalysis-type data sets can have significantly higher uncertainty than weather dataset products that primarily rely on historical observations.

Numerous past studies show that reanalysis-type climate models have a tendency to over-estimate sea surface temperature (Laprise et al., 2013), wind components (Brands et al., 2013), land temperature (Kim et al., 2014) and number of consecutive rainy days (more than 1 mm rainfall). Moreover, the effect of major cumulus parameterization closure scheme of climate models to simulate rainfall are found to largely affect the geographic distribution, frequency and intensity of rainfall (Qiao and Liang, 2016). Qiao and Liang (2016) discussed that such closure schemes also tend to overestimate number of rainy days in rainfall scenarios of such models.

The overestimation tendency, especially for precipitation, is also prevalent in the CFSR dataset, for the Asia Pacific region (Hu et al., 2016). Hu et al. (2016) did a comprehensive analysis of multiple reanalysis precipitation datasets for Central Asia and reported that precipitation datasets based on spatially interpolated historical observations are more accurate than reanalysis-type data sets (including CFSR). Since, precipitation is a fundamental input for hydrologic models, it is imperative that if synthetic precipitation data (generated via weather generators) is used in hydrologic model development, this data is produced via weather generators employing relatively accurate precipitation statistics (e.g., statistics 10-16 in Table 1). A comparison of observed rainfall data derived from National Oceanic and Atmospheric Administration, CFSR and APHRODITE at 36 different locations across 15 countries of Asia Pacific over 1981-2007 also reveals the inferior performance of CFSR rainfall compared to APHRODITE (refer to Table S1, Fig. S1, Fig.S2 and Fig. S3). Similar outperformance of APHRODITE over CFSR is reported for other areas in the Asia Pacific region, e.g., Mekong (Lauri et al., 2014; Thom and Khoi, 2017), middle east (Eini et al., 2019; Sidike et al., 2016) and China (Tang et al., 2019) and many others. Hence, the focus of this study is on providing an alternate (to CFSR) weather statistics data set (in SWAT-ready format) for the Asia-Pacific region, where precipitation statistics are derived from observed historical APHRODITE data. This dataset, i.e., the Asia Pacific Weather Statistics (APWS) dataset, derives precipitation statistics from the APHRODITE data set (which is based on spatially interpolated historic data), and is described in detail in the next section.

### 3.2 Preparation

The methodology adapted to generate the high-resolution dataset proposed in this study, i.e., the Asia Pacific Weather Statistics (APWS), is presented in Fig. 1.

*[Fig. 1 about here]*

APWS (see Fig. 1) derives rainfall statistics (at 0.25° resolution) from the historical observation-based APHRODITE dataset, and other weather statistics from CFSR. Numerous past studies have shown that the APHRODITE dataset is effective for hydrologic modeling in the Asia-Pacific region (Lauri et al., 2014; Panday et al., 2014), and hence it is chosen for deriving rainfall statistics for APWS. For preparing the APWS dataset, APHRODITE rainfall data for the period 1981-2007 is accessed from [http://search.diasjp.net/en/dataset/APHRO\\_PR](http://search.diasjp.net/en/dataset/APHRO_PR), and extracted for each grid center (at 0.25° resolution) using customized scripts in R. The 27 year of rainfall data used in the study is expected to yield robust estimates of rainfall statistics, as suggested by other studies (Fodor et al., 2013; Jones et al., 2010). The rainfall statistics, i.e., mean monthly rainfall (PCPMM), standard deviation (PCPSTD), skewness (PCPSKW), average number of rainfall days (PCPD), probability of wet day following dry

day (PR\_W(1,n)), probability of wet day following wet day (PR\_W(2,n)) and half hour maximum rainfall (RAINHHMX), needed for the weather generator in SWAT (see Table 1) are then estimated at each of these grid centers on the APHRODITE rainfall data (Liersch, 2003), using the executable provided by SWAT creators, i.e., pcpSTAT.exe. PcpSTAT.exe is a Fortran generated executable file provided by the SWAT development team to the potential SWAT modelers for the sole purpose of generating rainfall statistics using observed rainfall series (SWAT, 2019).

Since APHRODITE only includes rainfall statistics, remaining weather statistics of APWS that are needed in SWAT's weather generator (see Table 1), i.e., mean maximum temperature (TMPMX), mean minimum temperature (TMPMN), standard deviation of maximum temperature (TMPSTDMX), minimum temperature (TMPSTDMN), mean solar radiation (SOLARAV), wind speed (WNDV) and dew point temperature (DEWPT) are estimated from nearby CFSR locations, and accessed from <https://swat.tamu.edu/software/arcs SWAT/>. The Euclidean distance method is used to estimate the nearest CFSR stations for each grid center using customized R scripts. Finally, the hybrid weather statistics, which are collectively called APWS, are saved in an Excel file format which is compatible with SWAT's structured access database (that also includes weather statistics for SWAT's weather generator). The APWS dataset file has a size of approximately 50 MB and includes statistics of 48,000 weather locations across Asia Pacific region (Fig. S4). Improvements of the proposed APWS dataset over existing CFSR dataset are better spatial coverage ( $0.25^\circ$  in APWS vs  $0.38^\circ$  in CFSR) and precise rainfall statistics estimated from gridded observed rainfall data, compared to reanalysis data of CFSR. Section 4 provides a detailed illustration of how APWS has similar performance to that of OBS and relatively superior performance over CFSR for hydrologic modeling in the Asia Pacific region under limited availability of precipitation data.

### 3.3 Web-based dissemination

Realizing the importance of ready access for finalized and SWAT usable weather statistics, a web application / portal is also created to easily access and filter the APWS statistics at country, basin or user defined levels. Figure 2 provides an overview of the interface of the APWS data access portal. As depicted in Fig. 2 ('Selection Panel' inside the interface), users of the portal may filter out statistics of a region of interest by either i) delineating a custom shape on the portal map (rectangle or drawn polygon), ii) uploading a custom shape file, or iii) choosing a country. After selecting an area of interest, weather statistics of all data points within the area of interest may be downloaded as a csv file and subsequently imported into the SWAT database (i.e., the WGEN\_user table) for use as weather generation statistics (Neitsch et al., 2011).

The APWS web-portal also has a basic visual analytics component that allows users to visualize time-series plots of rainfall and temperature statistics for selected grid centers of interest (that become active on the map, within the area of interest selected; see Fig. 2). The APWS portal is developed in R, can be accessed from <https://hydra-water.shinyapps.io/APWS/>. The dataset can also be accessed from <http://doi.org/10.5281/zenodo.3460766> (Ghimire et al., 2019).

*[Fig. 2 about here]*

## 4 Performance evaluation of APWS dataset

In order to evaluate the performance of APWS dataset in effective hydrological simulation using SWAT in the Asian region, we used APWS for synthetic weather data generation for SWAT models of two river basins: Narayani (NRB) in Nepal and Wangchhu (WRB) in Bhutan. Figure 3 provides an overview of the design of our performance evaluation experiment. Section 4.1 presents the acquisition of data for selected river basins. Section 4.2 presents a brief comparison of monthly normals of observed, CFSR and APHRODITE rainfall. We then develop, calibrate and validate SWAT models of the Narayani and Wangchhu basins (see Sect. 4.3). The calibrated SWAT models use historical rainfall records at multiple stations during model development and calibration. In order to compare the performance (in the context of hydrologic modelling) of precipitation statistics of APWS, the default CFSR (normally used in SWAT) and statistics derived from observed rainfall (also called OBS), we develop alterations (also called ‘missing precipitation data’ scenarios) of the historical precipitation dataset where, in each scenario a specified percentage of historical data is missing (the missing days are randomly selected; discussed in Sect. 4.4). The SWAT models are then run with ‘missing precipitation data’ scenarios using i) observed rainfall-based weather statistics (OBS), ii) CFSR and iii) APWS weather statistics (to generate synthetic precipitation records for missing precipitation days; also called reconstructed rainfall) and hydrological simulations using the reconstructed rainfall records are compared. The flows simulated using reconstructed rainfall (from OBS, APWS and CFSR) are compared (see Sect. 4.5 for details) with flows simulated with unaltered rainfall (i.e., 0% missing data), as presented in methodological framework of Fig. 3. The OBS statistics are included in this study for a scenario, when modeler can generate the required weather statistics from long-term observed daily weather information and use them in SWAT. This also provides a benchmark for the performance evaluation of gridded products like CFSR and APWS.

*[Fig. 3 about here]*

### 4.1 Data acquisition for selected basins

The required rainfall, temperature and flow observations at daily timestep are acquired through Regional Integrated Multi Hazard Early Warning Systems (RIMES) center, Thailand and National Center of Meteorology and Hydrology (NCHM), Bhutan. Two river basins, Narayani (hereafter named NRB) in Nepal (36,000 sq.km) and Wangchhu (hereafter named WRB) in Bhutan (3,600 sq. km) are considered in this study to compare performance of APWS, CFSR and OBS statistics in weather generation. The location of NRB and WRB in south Asia, along with their topographical information and the flow stations considered in this study is presented in Fig. 4.

*[Fig. 4 about here]*

The NRB consists of 79 rainfall, 36 temperature and 3 flow stations as presented in Fig. S5. Similarly, the WRB has 7 rainfall, 7 temperature and 3 flow stations, as presented in Fig. S6. The meteorological and flow data are available for the years 2008-2014 in the NRB and 2000-2014 in the WRB respectively.



## 4.2 Comparison of rainfall normals

As APHRODITE is found superior to CFSR when compared with observed rainfall at majority of locations in Asia Pacific (refer to Table S1, Fig. S1, Fig. S2 and Fig. S3 in supplementary section), a similar comparison is done within NRB and WRB for four meteorological stations each. For WRB, 1981-2007 is chosen to compare the gridded (i.e., APHRODITE) and reanalysis (i.e., CFSR) rainfall series with observed rainfall. For NRB, observed rainfall data at all stations is only available for 2008-2014, thus the comparison is done for rainfall stations of Koshi river basin (i.e., another river basin in Nepal with climate attributes similar to NRB) with that of corresponding APHRODITE and CFSR datasets for the 1981-2007 period. A preliminary comparison of these three rainfall series for selected stations in the study basins suggested that CFSR significantly differs from the observed rainfall (see Fig. 5). Although differences in median rainfall are not significant at all stations, the distributions of monthly rainfall, depicted by violin-plots (over monthly precipitation data for years 1981-2007) in the top two rows of Fig. 5, illustrate that APHRODITE is more accurate, and thus more suitable, than CFSR for hydro-meteorological applications in the study basins.

[Fig. 5 about here]

The bottom two rows of Fig. 5 show plots of mean monthly rainfall for selected stations of the study basin. These plots illustrate that APHRODITE data is consistent with observed monthly rainfall distribution, albeit exhibiting some underestimations. The dominant rainfall seasonality (bottom two rows of Fig. 5) is also simulated well by APHRODITE, while CFSR has significant discrepancies in the study basins, which is expected to impact the hydrological application of CFSR statistics. The relatively better performance of APHRODITE over CFSR data series is not surprising, as the former is generated from the interpolation of ground rain gauges (Yatagai et al., 2012), while the latter is mostly a combination of satellite and observed data (Saha et al., 2010).

## 4.3 Hydrological model Setup

The SWAT model setup for NRB and WRB includes a 90mx90m digital elevation model (DEM) required for terrain processing and basin delineation (accessed from HydroSHEDS website <https://hydrosheds.cr.usgs.gov/dataavail.php>), a 300mx300m land cover information (accessed from European Space Agency (ESA) Globcover project website [http://due.esrin.esa.int/page\\_globcover.php](http://due.esrin.esa.int/page_globcover.php)), and a 1:5.000.000 scaled digital soil map of the world (DSMW) used to characterize soils in the study basins (accessed from [https://worldmap.harvard.edu/data/geonode:DSMW\\_RdY](https://worldmap.harvard.edu/data/geonode:DSMW_RdY)). Since SWAT is a semi-distributed hydrologic model, the modeled basins are divided into sub-basins, and further into unique land units, also called Hydrologic Response Units (HRUs) based upon a combination of slope, land use and soil information. Also, as SWAT is a highly parameterized model, both the NRB and WRB SWAT models are calibrated via automatic multi-site calibration. The SWATCUP software, and the Sequential Uncertainty Fitting (SUFI2) algorithm (Abbaspour, 2013), are used to calibrate models for both NRB and WRB satisfactorily at the selected six locations which is evident from the Nash Sutcliffe Efficiency (NSE) and Percentage Bias (PBIAS) values computed using daily flows (see Fig. 6). Results, as shown in the heat-maps of



255 Fig. 6, reveal that the calibrated SWAT models are able to capture annual variations in daily flows with reasonable accuracy (as depicted by NSE metric values). Moreover, volumetric error between simulated and observed flows are also reasonable during both calibration and validation periods (depicted by PBIAS values).

[Fig. 6 about here]

The consistency of model in simulating flows with satisfactory accuracy was observed for individual years, as can be seen in  
260 Fig. 6. Generally, the performance of SWAT in upper parts of basins (Jomsom, Haa) is relatively less accurate than in the middle (Sisaghat, Damchhu) and lower (Devghat, Chimakoti) parts. This trend has also been reported in other studies (Poncelet et al., 2017; Van Esse et al., 2013).

#### 4.4 Missing precipitation scenario analysis

265 Since a primary premise of this study is to compare the performance of the proposed APWS weather generation statistics dataset against observation-based weather statistics (OBS) and CFSR statistics dataset for SWAT models developed for the Asia Pacific region, our dataset quality comparison experiment setup is based on generation of hydrologic modeling scenarios where precipitation records are missing (as depicted in Fig. 3). Eleven different precipitation scenarios are generated in this experiment setup where different percentages of rainfall data (i.e., 1, 5, 10, 15, 20, 25, 30, 35, 40, 45 and 50 percent) are  
270 missing from the historical rainfall record time-series. For each scenario, say  $X\%$  missing data scenario, precipitation records of  $X\%$  days are randomly (uniform) sampled (for each year of data record) and removed from the historical data set (Note: For each missing day, data of all rain gauges was removed from record). Since each precipitation scenario (say  $X\%$  missing data scenario) is stochastic,  $N$  different instances ( $N = 100$  in our experiments) are generated for each scenario.

Consequently, SWAT models with i) OBS, ii) APWS and iii) CFSR weather statistics are run for all scenarios and instances.  
275 The WXGEN weather generator built in SWAT is automatically invoked to fill missing rainfall values. Hence, when the OBS, APWS and CFSR weather statistics are applied in separate SWAT runs, for the same missing data scenarios and instances, we obtain separate hydrologic outputs (based on precipitation data filled by the weather generator using the different statistic sets). The hydrologic outputs generated via OBS, APWS and CFSR are subsequently compared against the ‘baseline’ SWAT hydrologic output, i.e., without any missing historical precipitation records. The criteria for quantifying the difference between  
280 OBS-based, APWS-based & CFSR-based hydrologic flows (under different missing precipitation scenarios), and baseline flows, are discussed in Sect. 4.5.

#### 4.5 Comparison of OBS, CFSR and APWS

To provide equal weightage for low and high flows, the hydrologic flow values in this study are transformed initially using a Box-Cox transformation technique (Box and Cox, 1964) and then evaluated using the standard indices like NSE and PBIAS.  
285 For the transformation, a lambda value of 0.25 is assumed following Willems (2009). The NSE and PBIAS metrics are computed by comparing i) flows simulated from reconstructed rainfall using OBS, APWS and CFSR datasets (under different

missing precipitation scenarios discussed in Sect. 3.4) with ii) unaltered rainfall simulated flows (also called baseline flows as discussed in Sect. 4.4. The results of performance evaluation for the WRB is presented in Fig. 7, where the lines represent average NSE and PBIAS values and shaded areas represent their standard deviations, for each of OBS, APWS and CFSR simulated daily flows.

*[Fig. 7 about here]*

Results for WRB stations clearly show that accuracy of weather statistics is of paramount importance in filling the rainfall series and subsequently, in accurate simulation of hydrologic flows. The OBS and APWS datasets are found to have similar performance. Moreover, APWS clearly outperforms CFSR since both NSE and PBIAS values for APWS remain reasonable even with 50% missing precipitation data. Moreover, the difference in performance of the OBS, APWS and CFSR statistics is more significant in smaller sub-basins located in upper parts of the basin (e.g., represented by the Haa station in left-most panels of Fig. 7), compared to the lower parts. A reason for this difference could be the subsequent dampening of the missing rainfall events, as the flow progresses downstream. The smaller sub-basins located in the upper parts of the study basins are more flashy in nature compared to the lower sub-basins, which has been established to negatively impact the hydrological model performance (Poncelet et al., 2017). The performance of hydrological models is also generally better at the downstream locations and increases with size of basins (Merz et al., 2011; Van Esse et al., 2013)

A significant deviation of NSE is observed for all flow stations in WRB, when CFSR weather statistics are used to fill the missing rainfall series in the WRB. The rainfall statistics of CFSR were significantly different than observed and APHRODITE data for the basin, as evident from Fig. 5. This is likely to yield large errors from the baseline simulated flows (i.e., without missing precipitation data) when CFSR is used to fill the missing rainfall series. The biased nature of CFSR in WRB is also evident from the PBIAS computed at its flow stations. The biases aggregate more than 50% in all stations, when 20% or less rainfall data is missing, and the weather generator with CFSR statistics is used to generate synthetic rainfall data for missing days. The APWS however is found to have almost similar performance to that of OBS, as the differences between the observed and APHRODITE rainfall were also minimal as evident in Fig. 5. A similar performance of APWS with OBS and overall relative superiority (of both datasets) over CFSR is also evident for NRB in Fig. 8, wherein NSE and PBIAS indices for APWS and OBS datasets are clearly better than the corresponding NSE and PBIAS indices for CFSR.

*[Fig. 8 about here]*

Results of NRB, as presented in Fig. 8, also depict that the size and location of a sub-basin has a significant impact on performance of weather statistics in simulating hydrologic flows, i.e., smaller sub-basins that are located in upper parts of basins, and have no contributions from other tributaries, tend to be heavily reliant on accurate observed weather data for accurate hydrologic simulation. The Jomsom hydrological station located in the northernmost part of the NRB (Fig. 8, left-most panels) is part of a small sub-basin of NRB and is devoid of contribution from other tributaries in the basin.

Moreover, the sub-basin that Jomsom drains has an arid climatology, with a mean annual rainfall of around 350 mm (as presented in Fig. S7). Arid basins have been known to have lower model efficiency compared to wet basins (Poncelet et al., 2017). Hence, the NSE and PBIAS values at Jomsom, become significantly worse (compared to the other stations located in

lower parts of the basin), as the percentage missing data value increases slightly. In arid and semi-arid sub-basins, total rainfall is mostly contributed by rainfall events rather than rainfall seasonality, due to which even a smaller percentage of missing data concentrated around such events is likely to deteriorate the hydrological model performance. The use of weather generator to reconstruct the missing rainfall is thus likely to change the rainfall sequence in such basins thus degrading the performance of weather generators significantly even for few missing events. Similarly, as the size of basin increases and as we approach the lower parts of NRB where rainfall volume is significant, the reduction in performance of the weather statistics is gradual. Both APWS and CFSR datasets perform adequately in NRB for stations located in the lower part of the river basin (see results for Sisaghat and Devghat in Fig. 8). However, performance of APWS is slightly better for these stations as well and almost matches to that of OBS. Overall, a consensus could be derived from both study basins that performance of APWS is similar to that of OBS and better than CFSR statistics, in terms of deriving synthetic rainfall data for missing days at observed weather stations and, subsequently, in simulating hydrologic flows under limited precipitation data availability scenarios.

A preliminary analysis of six hydrological stations (3 in each basin) in this study suggests that smaller river basins (within few thousand square kilometers) are likely to benefit more from the developed APWS dataset (for e.g. refer to locations of Haa and Jomsom stations in Wangchhu and in Narayani river basins in Fig. 4 and check their performances in Fig. 7 and Fig. 8). First order river basins exhibit higher variability among the flows simulated by different weather statistics than the second and tertiary order river basins (again refer to Fig. 4 and Fig. 7 and Fig. 8). Hence, synthetic rainfall generation from a more accurate statistics dataset like APWS is recommended for first order basins.

Our analysis also indicates that, for the two study basins, observed precipitation data gaps in the range of 0-30% are can be adequately filled with synthetic data using APWS. Performance of SWAT deteriorates significantly if more than 30% of observed precipitation data is missing. Hence, it is recommended that APWS be used in SWAT scenarios, where up to 30% observed rainfall data is missing (for larger basins, even 50% missing data scenarios may be acceptable). It should also be noted that this percentage threshold (i.e., 30%) may be an over-estimation for highly arid basins, where typically, the entire annual rainfall occurs within a day or two.

## 5 Sensitivity of the rainfall statistics

Sensitivity analysis aims to measure the impact of fluctuations in parameters of a model to its outputs or performance (Balaman, 2018). This study also aims to assess the sensitivity of synthetically generated precipitation data (via the SWAT weather generator) to the rainfall statistics used in SWAT's weather generator, i.e., PCPMM, PCPSTD, PCPSKW, PR\_W(1,n), PR\_W(2,n), PCPD and RAINHHMX. The sensitivity assessment mechanism is initiated by first creating 100 random missing precipitation scenarios of 30% missing rainfall data. The SWAT weather generator, i.e., WXGEN, is then used to generate precipitation data for the 30% missing days (for all 100 random scenarios), with the original APWS statistics dataset, and for selected precipitation stations in WRB, and subsequently the SWAT hydrologic model is run to generate simulated flows. The difference in simulated flows from generated weather data and actual weather data, i.e., without missing precipitation days

(computed for each random scenario and quantified via NSE and PBIAS metrics) is recorded as the baseline / unaltered hydrologic performance of weather statistics. Subsequently, individual rainfall statistics (i.e., PCPMM, PCPSTD, PCPSKW, PR\_W(1,n), PR\_W(2,n), PCPD and RAINHHMX) are changed by  $\pm 5$ ,  $\pm 10$  and  $\pm 25\%$ , with one-at-a-time (OAT) approach (Cacuci et al., 2005), keeping other statistics fixed at their nominal values, and WXGEN is used to generate precipitation data for the 30% missing days (for all 100 random scenarios) with these altered rainfall statistics and used to drive the SWAT model for daily flow simulation. The sensitivity of rainfall statistics is finally shown in terms of Box-Cox transformed NSE and PBIAS indicators. These PBIAS estimated by comparing i) simulated flows from generated weather data (from OAT-altered rainfall statistics) and ii) simulated flows obtained after running SWAT with actual weather data for WRB is presented in Fig. 9.

*[Fig. 9 about here]*

The results of sensitivity analysis of rainfall statistics of APWS done over WRB in Bhutan, suggests that probability of a wet day following wet day (PR\_W (2, n) is most sensitive in altering the performance of daily flows simulated using reconstructed rainfall. Mean rainfall followed by number of rainy days (PCPD) are found to be second and third most sensitive rainfall statistics for precise rainfall generation in WRB, as presented in Fig. 9. This is expected as the identification of a day as rainy/non-rainy depends upon the probability values defined in the weather statistics. Only when the day is designated rainy, the weather generator makes use of the mean, standard deviation and skewness of monthly rainfall to estimate the rain amount. Similarly, probability of wet day following dry day (PR\_W (1, n)) is expected to have less sensitivity in the WRB basin, as generation of rainfall values on a spell of dry days is unlikely to change the flow regime. Similarly, RAINHHMX is found insensitive to weather generation in the basin. The sensitivity of rainfall statistics on daily flow simulation is expected to vary with different climatology and basin characteristics. A similar sensitivity analysis of the rainfall statistics in specifying model performance in terms of NSE also confirms that PR\_W(2, n), PCPMM and PCPD are most sensitive in rainfall reconstruction for the study basin (see Fig. S8).

## 6 Data availability

The AWPS dataset is archived for long-term storage and visual analytics at <https://hydra-water.shinyapps.io/APWS/>. The file size of Excel dataset is around 50 MB, which is itself in SWAT-ready format and can be accessed from <http://doi.org/10.5281/zenodo.3460766> (Ghimire et al., 2019).

## 7 Conclusions

SWAT is a semi-distributed hydrologic model that is immensely popular in the Asia-Pacific region. However, given its semi-distributed nature, accuracy of SWAT is reliant on precipitation input data (that should be available at relatively high spatial and temporal resolutions). Since, availability of observed precipitation data is limited in river basins of Asia Pacific, a viable

alternate is synthetic precipitation data, obtained from weather generators. The synthetic generation of precipitation data needs precise rainfall statistics and a weather generator capable of simulating synthetic weather data.

385 The SWAT model includes a built-in weather generator (also called WXGN) that generates weather data wherever required (e.g., when data for some dates is missing in observed series), and SWAT modelers can use the readily available CFSR statistics dataset as input for WXGN. Even though CFSR statistics cover the entire globe, they are generated from combination of reanalysis data and satellite information, and CFSR's precipitation-related statistics have reportedly low accuracy levels for the Asia Pacific region. The APHRODITE dataset can be a better alternative for estimating core precipitation statistics for the Asia Pacific region, as it was generated by interpolation of observed rainfall gages in the Asia Pacific region.

Given the prior successful applications of APHRODITE in the region, this study proposes the APWS weather statistics dataset for the Asia Pacific region, that combines precipitation weather statistics from APHRODITE with other weather statistics from CFSR. The APWS dataset is specifically designed to work with SWAT for generation of synthetic weather data, wherever observed weather data is unavailable.

395 A comprehensive experimental (model-based) comparison of APWS, [observed surface rainfall station derived weather statistics \(OBS\)](#) and CFSR is also conducted in this study, that shows that performance of APWS [is comparable to OBS and better than](#) CFSR, for simulating hydrologic flows with SWAT in scenarios where observed precipitation data is missing. Both APWS and CFSR statistics are applied to SWAT models of two river basins in Asia, i.e., Narayani and Wangchhu, along with the observed rainfall statistics. The APWS statistics clearly outperform CFSR in generating synthetic rainfall data (wherever  
400 observed data is missing) and subsequently simulating the daily flows in both river basins, particularly for smaller independent sub-basins.

The APWS dataset is available via a web interface that has been developed for its public and easy access. Further investigations may be required to verify and improve the performance of APWS in other basins of region with contrasting climates. Hence, the authors encourage further testing of the APWS dataset in the Asia Pacific region, which has been prepared at a higher  
405 spatial resolution ( $0.25^{\circ} \times 0.25^{\circ}$ ) than that of existing CFSR ( $0.38^{\circ} \times 0.38^{\circ}$ ) dataset.

## 7 Author contribution

UG and NS conceptualized the study. UG handled the APHRODITE data extraction and generation of weather statistics for entire Asia Pacific. NS developed the hydrological models for the study basins. TA developed the web platform and the automation of the hydrological models to check their performance using the weather statistics. UG drafted the manuscript and  
410 TA, NS and PD provided their comments and revision.

## 8 Acknowledgement

The required rainfall, temperature and flow data for Narayani river basin were acquired from RIMES project on “Development of End to End Flood Forecasting System and Decision Support System in Nepal”, where the first author was working as a hydrologist previously. Special thanks go to Department of Hydrology and Meteorology, Nepal and Mr. Sangay Tenzin, Chief of Hydrology division, National Center for Hydrology and Meteorology, Bhutan.

## 9 Competing interests

The authors declare that they have no conflict of interest.

## References

- Abbaspour, K. C.: SWAT-CUP 2012, SWAT Calibration and Uncertainty Program—A User Manual, 2013.
- 420 Ailliot, P., Allard, D., Monbet, V., and Naveau, P.: Stochastic weather generators: an overview of weather type models, *Journal de la Société Française de Statistique*, 156, 101-113, 2015.
- Alemayehu, T., Griensven, A. v., and Bauwens, W.: Evaluating CFSR and WATCH data as input to SWAT for the estimation of the potential evapotranspiration in a data-scarce Eastern-African catchment, *Journal of Hydrologic Engineering*, 21, 05015028, 2015.
- 425 Anders, A. M., Roe, G. H., Hallet, B., Montgomery, D. R., Finnegan, N. J., and Putkonen, J.: Spatial patterns of precipitation and topography in the Himalaya, *Special Papers-Geological Society of America*, 398, 39, 2006.
- Aouissi, J., Benabdallah, S., Chabaâne, Z. L., and Cudennec, C.: Evaluation of potential evapotranspiration assessment methods for hydrological modelling with SWAT—Application in data-scarce rural Tunisia, *Agricultural Water Management*, 174, 39-51, 2016.
- 430 Apurv, T., Mehrotra, R., Sharma, A., Goyal, M. K., and Dutta, S.: Impact of climate change on floods in the Brahmaputra basin using CMIP5 decadal predictions, *Journal of Hydrology*, 527, 281-291, 2015.
- Arnold, J. G., Moriasi, D. N., Gassman, P. W., Abbaspour, K. C., White, M. J., Srinivasan, R., Santhi, C., Harmel, R., Van Griensven, A., and Van Liew, M. W.: SWAT: Model use, calibration, and validation, *Transactions of the ASABE*, 55, 1491-1508, 2012.
- 435 Awange, J., and Forootan, E.: An evaluation of high-resolution gridded precipitation products over Bhutan (1998–2012), *International Journal of Climatology*, 36, 1067-1087, 2016.
- Balaman, S. Y.: Decision-making for Biomass-based Production Chains: The Basic Concepts and Methodologies, Academic Press, 2018.
- Box, G. E., and Cox, D. R.: An analysis of transformations, *Journal of the Royal Statistical Society: Series B (Methodological)*, 440 26, 211-243, 1964.

- Brands, S., Herrera, S., Fernández, J., and Gutiérrez, J. M.: How well do CMIP5 Earth System Models simulate present climate conditions in Europe and Africa?, *Climate dynamics*, 41, 803-817, 2013.
- Cacuci, D. G., Ionescu-Bujor, M., and Navon, I. M.: Sensitivity and uncertainty analysis, volume II: applications to large-scale systems, CRC press, 2005.
- 445 Candela, L., Tamoh, K., Olivares, G., and Gomez, M.: Modelling impacts of climate change on water resources in ungauged and data-scarce watersheds. Application to the Siurana catchment (NE Spain), *Science of the total environment*, 440, 253-260, 2012.
- Caraway, N. M., McCreight, J. L., and Rajagopalan, B.: Multisite stochastic weather generation using cluster analysis and k-nearest neighbor time series resampling, *Journal of hydrology*, 508, 197-213, 2014.
- 450 Chen, C. J., Senarath, S. U., Dima-West, I. M., and Marcella, M. P.: Evaluation and restructuring of gridded precipitation data over the Greater Mekong Subregion, *International Journal of Climatology*, 37, 180-196, 2017.
- Cruz, F. T., and Sasaki, H.: Simulation of present climate over Southeast Asia using the non-hydrostatic regional climate model, *Sola*, 13, 13-18, 2017.
- Daggupati, P., Srinivasan, R., Dile, Y. T., and Verma, D.: Reconstructing the historical water regime of the contributing basins  
455 to the Hawizeh marsh: Implications of water control structures, *Science of the Total Environment*, 580, 832-845, 2017.
- Decker, M., Brunke, M. A., Wang, Z., Sakaguchi, K., Zeng, X., and Bosilovich, M. G.: Evaluation of the reanalysis products from GSFC, NCEP, and ECMWF using flux tower observations, *Journal of Climate*, 25, 1916-1944, 2012.
- Dile, Y. T., and Srinivasan, R.: Evaluation of CFSR climate data for hydrologic prediction in data-scarce watersheds: an application in the Blue Nile River Basin, *JAWRA Journal of the American Water Resources Association*, 50, 1226-1241,  
460 2014.
- Eames, M., Kershaw, T., and Coley, D.: A comparison of future weather created from morphed observed weather and created by a weather generator, *Building and Environment*, 56, 252-264, 2012.
- Eini, M. R., Javadi, S., Delavar, M., Monteiro, J. A., and Darand, M.: High accuracy of precipitation reanalyses resulted in good river discharge simulations in a semi-arid basin, *Ecological engineering*, 131, 107-119, 2019.
- 465 El Kenawy, A. M., and McCabe, M. F.: A multi-decadal assessment of the performance of gauge-and model-based rainfall products over Saudi Arabia: climatology, anomalies and trends, *International Journal of Climatology*, 36, 656-674, 2016.
- Fodor, N., Dobi, I., Mika, J., and Szeidl, L.: Applications of the MVWG multivariable stochastic weather generator, *The Scientific World Journal*, 2013, 2013.
- Francesconi, W., Srinivasan, R., Pérez-Miñana, E., Willcock, S. P., and Quintero, M.: Using the Soil and Water Assessment  
470 Tool (SWAT) to model ecosystem services: A systematic review, *Journal of Hydrology*, 535, 625-636, 2016.
- Ghimire, U., Akhtar, T., Shrestha, N., and Daggupati, P.: drkupi/APWS: APWS Web Portal (Version v1.0), Zenodo.  
<http://doi.org/10.5281/zenodo.3460766>, 2019.
- Hu, Z., Hu, Q., Zhang, C., Chen, X., and Li, Q.: Evaluation of reanalysis, spatially interpolated and satellite remotely sensed precipitation data sets in central Asia, *Journal of Geophysical Research: Atmospheres*, 121, 5648-5663, 2016.



- 475 Jones, P., Harpham, C., Kilsby, C., Glenis, V., and Burton, A.: UK Climate Projections science report: Projections of future daily climate for the UK from the Weather Generator, 2010.
- Jones, P. G., and Thornton, P. K.: Generating downscaled weather data from a suite of climate models for agricultural modelling applications, *Agricultural Systems*, 114, 1-5, 2013.
- Khan, N., Shahid, S., Ahmed, K., Ismail, T., Nawaz, N., and Son, M.: Performance assessment of general circulation model  
480 in simulating daily precipitation and temperature using multiple gridded datasets, *Water*, 10, 1793, 2018.
- Kim, J., Waliser, D. E., Mattmann, C. A., Goodale, C. E., Hart, A. F., Zimdars, P. A., Crichton, D. J., Jones, C., Nikulin, G., and Hewitson, B.: Evaluation of the CORDEX-Africa multi-RCM hindcast: systematic model errors, *Climate dynamics*, 42, 1189-1202, 2014.
- Kolokotroni, M., Ren, X., Davies, M., and Mavrogianni, A.: London's urban heat island: Impact on current and future energy  
485 consumption in office buildings, *Energy and buildings*, 47, 302-311, 2012.
- Kulkarni, A., Patwardhan, S., Kumar, K. K., Ashok, K., and Krishnan, R.: Projected climate change in the Hindu Kush-Himalayan region by using the high-resolution regional climate model PRECIS, *Mt Res Dev*, 33, 142-151, 2013.
- Laprise, R., Hernández-Díaz, L., Tete, K., Sushama, L., Šeparović, L., Martynov, A., Winger, K., and Valin, M.: Climate projections over CORDEX Africa domain using the fifth-generation Canadian Regional Climate Model (CRCM5),  
490 *Climate Dynamics*, 41, 3219-3246, 2013.
- Lauri, H., Räsänen, T., and Kumm, M.: Using reanalysis and remotely sensed temperature and precipitation data for hydrological modeling in monsoon climate: Mekong River case study, *Journal of Hydrometeorology*, 15, 1532-1545, 2014.
- Liersch, S.: The Program pcpSTAT: user's manual, Berlin, August 2003, 5, 2003.
- 495 Lu, Y., Qin, X., and Mandapaka, P.: A combined weather generator and K-nearest-neighbour approach for assessing climate change impact on regional rainfall extremes, *International Journal of Climatology*, 35, 4493-4508, 2015.
- Martin, D. J., Howard, A., Hutchinson, R., McGree, S., and Jones, D. A.: Development and implementation of a climate data management system for western Pacific small island developing states, *Meteorological Applications*, 22, 273-287, 2015.
- Merz, R., Parajka, J., and Blöschl, G.: Time stability of catchment model parameters: Implications for climate impact analyses,  
500 *Water Resources Research*, 47, 2011.
- Monteiro, J. A., Strauch, M., Srinivasan, R., Abbaspour, K., and Gücker, B.: Accuracy of grid precipitation data for Brazil: application in river discharge modelling of the Tocantins catchment, *Hydrological processes*, 30, 1419-1430, 2016.
- Neitsch, S. L., Arnold, J. G., Kiniry, J. R., and Williams, J. R.: Soil and water assessment tool theoretical documentation version 2009, Texas Water Resources Institute, 2011.
- 505 Page, C. M., Nicholls, N., Plummer, N., Trewin, B., Manton, M., Alexander, L., Chambers, L. E., Choi, Y., Collins, D. A., and Gosai, A.: Data rescue in the southeast Asia and south Pacific region: challenges and opportunities, *Bulletin of the American Meteorological Society*, 85, 1483-1490, 2004.

- Panday, P. K., Williams, C. A., Frey, K. E., and Brown, M. E.: Application and evaluation of a snowmelt runoff model in the Tamor River basin, Eastern Himalaya using a Markov Chain Monte Carlo (MCMC) data assimilation approach, *Hydrological Processes*, 28, 5337-5353, 2014.
- Parker, W. S.: Reanalyses and observations: What's the difference?, *Bulletin of the American Meteorological Society*, 97, 1565-1572, 2016.
- Poncelet, C., Merz, R., Merz, B., Parajka, J., Oudin, L., Andréassian, V., and Perrin, C.: Process-based interpretation of conceptual hydrological model performance using a multinational catchment set, *Water Resources Research*, 53, 7247-7268, 2017.
- Qiao, F., and Liang, X. Z.: Effects of cumulus parameterization closures on simulations of summer precipitation over the United States coastal oceans, *Journal of Advances in Modeling Earth Systems*, 8, 764-785, 2016.
- Richardson, C. W.: Stochastic simulation of daily precipitation, temperature, and solar radiation, *Water resources research*, 17, 182-190, 1981.
- Richardson, C. W., and Wright, D. A.: WGEN: A model for generating daily weather variables, 1984.
- Saha, S., Moorthi, S., Pan, H.-L., Wu, X., Wang, J., Nadiga, S., Tripp, P., Kistler, R., Woollen, J., and Behringer, D.: The NCEP climate forecast system reanalysis, *Bulletin of the American Meteorological Society*, 91, 1015-1058, 2010.
- Semenov, M. A., and Barrow, E. M.: Use of a stochastic weather generator in the development of climate change scenarios, *Climatic change*, 35, 397-414, 1997.
- Sharpley, A. N.: EPIC-erosion/productivity impact calculator: 1, Model Documentation, USDA Techn. Bull. 1759, 235, 1990.
- Sidike, A., Chen, X., Liu, T., Durdiev, K., and Huang, Y.: Investigating alternative climate data sources for hydrological simulations in the upstream of the Amu Darya River, *Water*, 8, 441, 2016.
- Sohn, S. J., Tam, C. Y., Ashok, K., and Ahn, J. B.: Quantifying the reliability of precipitation datasets for monitoring large-scale East Asian precipitation variations, *International Journal of Climatology*, 32, 1520-1526, 2012.
- Srivastav, R. K., and Simonovic, S. P.: Multi-site, multivariate weather generator using maximum entropy bootstrap, *Climate Dynamics*, 44, 3431-3448, 2015.
- Steinschneider, S., and Brown, C.: A semiparametric multivariate, multisite weather generator with low-frequency variability for use in climate risk assessments, *Water resources research*, 49, 7205-7220, 2013.
- Supit, I., Van Diepen, C., De Wit, A., Wolf, J., Kabat, P., Baruth, B., and Ludwig, F.: Assessing climate change effects on European crop yields using the Crop Growth Monitoring System and a weather generator, *Agricultural and Forest Meteorology*, 164, 96-111, 2012.
- ArcSWAT CFSR\_World Weather Database: <https://swat.tamu.edu/software/arcsbat/>, 2014.
- SWAT: Soil and Water Assessment Tool: <https://swat.tamu.edu/software/>, 2019.
- Tang, X., Zhang, J., Wang, G., Yang, Q., Yang, Y., Guan, T., Liu, C., Jin, J., Liu, Y., and Bao, Z.: Evaluating Suitability of Multiple Precipitation Products for the Lancang River Basin, *Chinese geographical science*, 29, 37-57, 2019.

- Thom, V. T., and Khoi, D. N.: Using gridded rainfall products in simulating streamflow in a tropical catchment—A case study of the Srepok River Catchment, Vietnam, *Journal of Hydrology and Hydromechanics*, 65, 18-25, 2017.
- Um, M. J., Kim, Y., and Kim, J.: Evaluating historical drought characteristics simulated in CORDEX East Asia against observations, *International Journal of Climatology*, 37, 4643-4655, 2017.
- 545 Van Esse, W., Perrin, C., Booij, M. J., Augustijn, D. C., Fenicia, F., Kavetski, D., and Lobligois, F.: The influence of conceptual model structure on model performance: a comparative study for 237 French catchments, *Hydrology and earth system sciences*, 17, 4227-4239, 2013.
- Willems, P.: A time series tool to support the multi-criteria performance evaluation of rainfall-runoff models, *Environmental Modelling & Software*, 24, 311-321, 2009.
- 550 WMO: Regional Association II (Asia): Sixteenth session Abu Dhabi, World Meteorological Organization, Geneva, Switzerland, 2017.
- Worqlul, A. W., Yen, H., Collick, A. S., Tilahun, S. A., Langan, S., and Steenhuis, T. S.: Evaluation of CFSR, TMPA 3B42 and ground-based rainfall data as input for hydrological models, in data-scarce regions: The upper Blue Nile Basin, Ethiopia, *Catena*, 152, 242-251, 2017.
- 555 Xie, P., Chen, M., Yang, S., Yatagai, A., Hayasaka, T., Fukushima, Y., and Liu, C.: A gauge-based analysis of daily precipitation over East Asia, *Journal of Hydrometeorology*, 8, 607-626, 2007.
- Yang, Y., Wang, G., Wang, L., Yu, J., and Xu, Z.: Evaluation of gridded precipitation data for driving SWAT model in area upstream of three gorges reservoir, *PLoS One*, 9, e112725, 2014.
- Yatagai, A., Kamiguchi, K., Arakawa, O., Hamada, A., Yasutomi, N., and Kitoh, A.: APHRODITE: Constructing a long-term  
560 daily gridded precipitation dataset for Asia based on a dense network of rain gauges, *Bulletin of the American Meteorological Society*, 93, 1401-1415, 2012

**Table 1 Weather statistics used by SWAT model to generate or fill missing weather inputs**

| <b>No.</b> | <b>Variable name</b> | <b>Description</b>                                                       | <b>How does it affect weather generation in SWAT?</b>                                                                                                                                                       |
|------------|----------------------|--------------------------------------------------------------------------|-------------------------------------------------------------------------------------------------------------------------------------------------------------------------------------------------------------|
| 1          | TITLE                | Name of the weather station                                              | Does not affect                                                                                                                                                                                             |
| 2          | WLATITUDE            | Latitude of weather station in decimal degrees                           | Each subbasin in SWAT is assigned with closest weather generator based on latitude and longitude which changes all weather statistics                                                                       |
| 3          | WLONGITUDE           | Longitude of weather station in decimal degrees                          |                                                                                                                                                                                                             |
| 4          | WELEV                | Elevation of the weather station in meters                               | Rainfall and temperatures are defined accordingly for each elevation band depending upon the elevation of weather station and elevation of the weather statistics                                           |
| 5          | RAIN_YRS             | Number of years of weather data used to generate weather statistics      | Maximum 0.5 hourly rainfall for the sub-basins are defined based upon the number of years                                                                                                                   |
| 6          | TMPMX                | Average daily maximum temperature for a given month of all years         | Needed to generate mean temperature at the center of basins when TLAPS parameter is considered for elevation bands. They are also used to estimate potential evapotranspiration and other weather variables |
| 7          | TMPMN                | Average daily minimum temperature of a month for all years               |                                                                                                                                                                                                             |
| 8          | TMPSTDMX             | Standard deviation of daily maximum temperature for a month in all years | The mean and standard deviation of temperatures are also used to find the amount of temperature to fill given the status of day (rainy/non-rainy)                                                           |
| 9          | TMPSTDMN             | Standard deviation of daily minimum temperature for a month in all years |                                                                                                                                                                                                             |

|    |           |                                                                       |                                                                                                                                                  |
|----|-----------|-----------------------------------------------------------------------|--------------------------------------------------------------------------------------------------------------------------------------------------|
| 10 | PCPMM     | Total precipitation for a month averaged for all years                | The mean, standard deviation and skewness parameter are used to determine the amount of precipitation to fill for a rainy day                    |
| 11 | PCPSTD    | Standard deviation of daily rainfall in a month for all years         |                                                                                                                                                  |
| 12 | PCPSKW    | Skew coefficient of daily rainfall in a month                         |                                                                                                                                                  |
| 13 | PR_W(1,n) | Probability of a wet day following dry day in "n" month for all years | Based upon the probabilities of a missing day, it will determine whether the day will be rainy or not for each month                             |
| 14 | PR_W(2,n) | Probability of wet day following wet day in "n" month for all years   |                                                                                                                                                  |
| 15 | PCPD      | Average number of rainfall days in a month                            | Used in PLAPS parameter to generate rainfall at each elevation band                                                                              |
| 16 | RAINHHMX  | Maximum half hour rainfall in a month for all years                   | Unknown                                                                                                                                          |
| 17 | SOLARAV   | Average solar radiation for a month for all years                     | Used in generation of series of solar radiation, dew point and wind speed to use for evapotranspiration calculation using Penman Monteith method |
| 18 | DEWPT     | Average dew point temperature for a month for all years               |                                                                                                                                                  |
| 19 | WNDAY     | Average wind speed for a month for all years                          |                                                                                                                                                  |

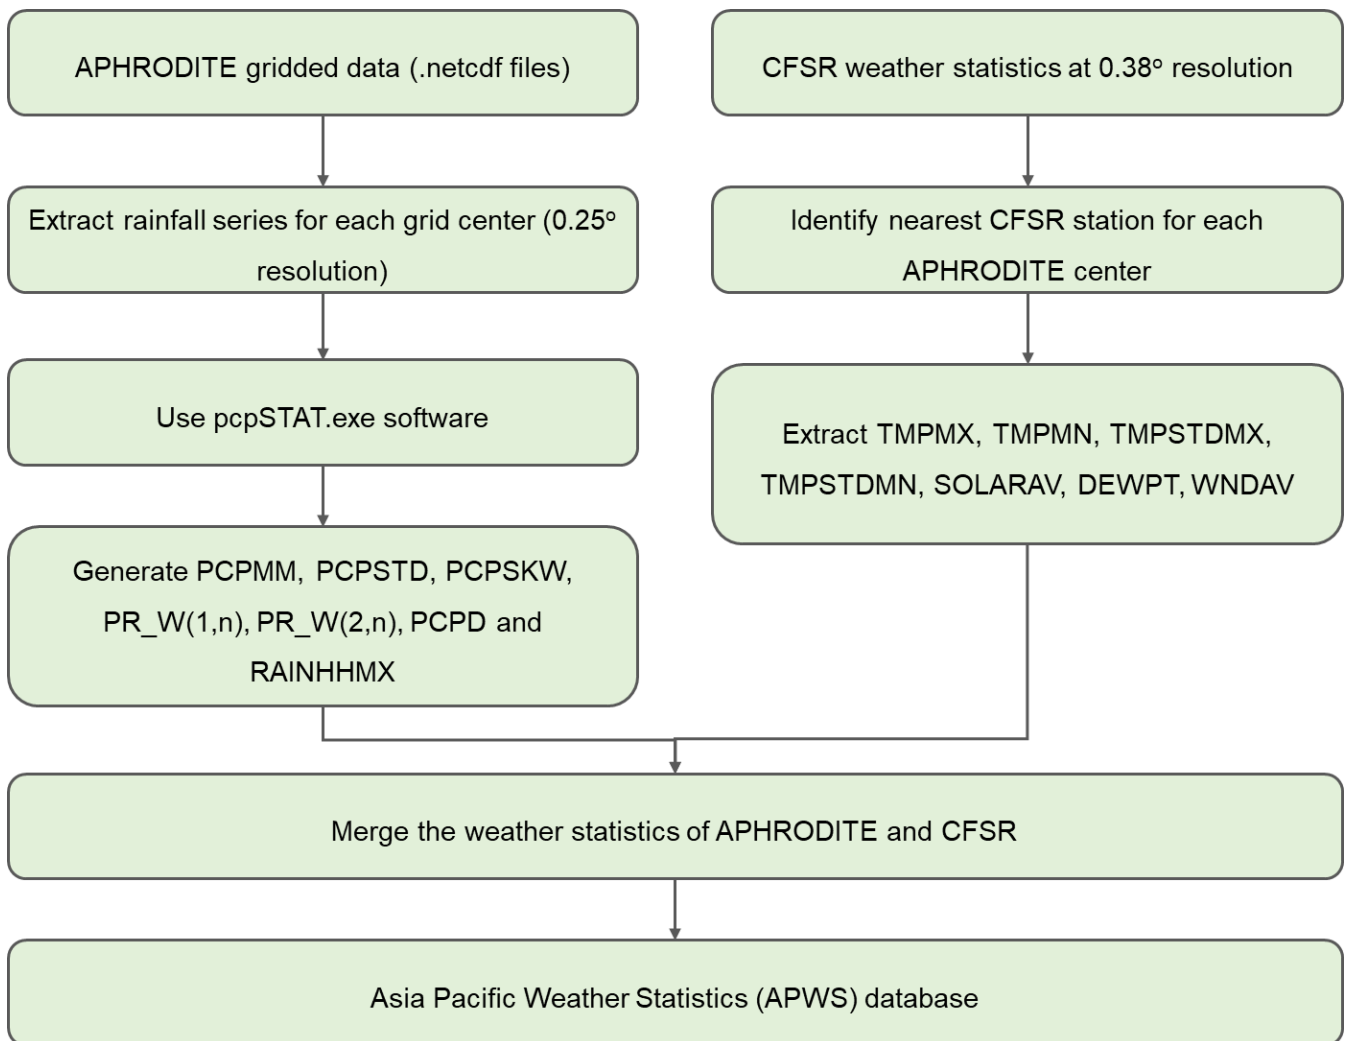

**Fig. 1** Generation of APWS dataset for Asia Pacific region

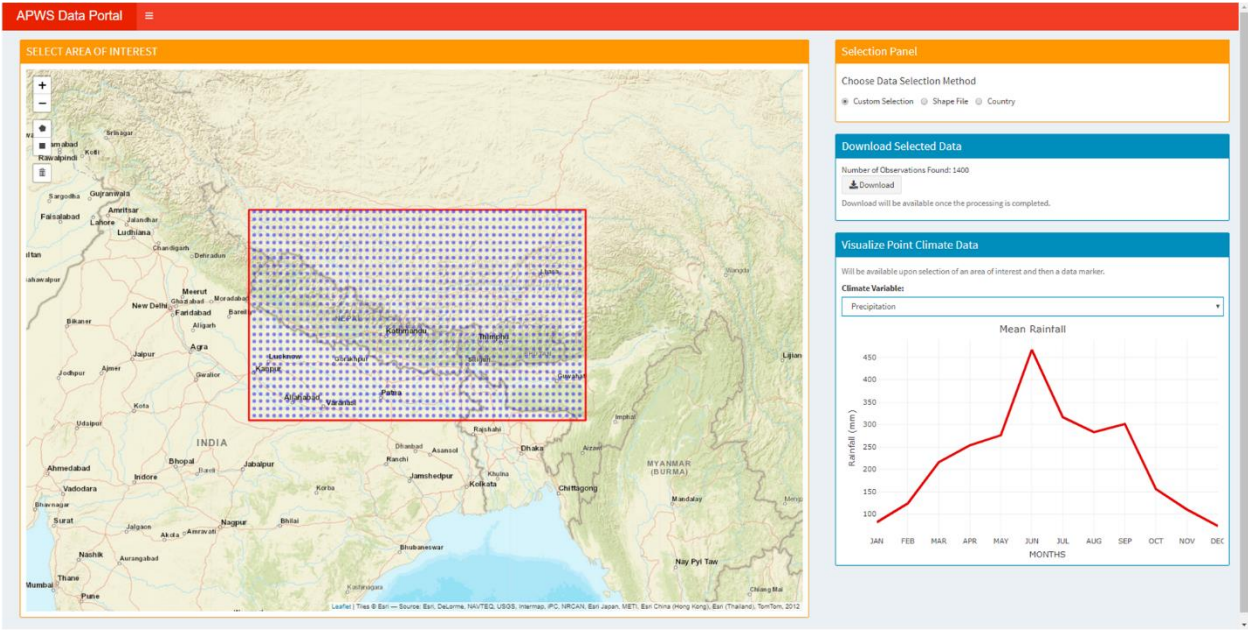

Fig. 2 Web platform designed to disseminate APWS data in Asia Pacific basins



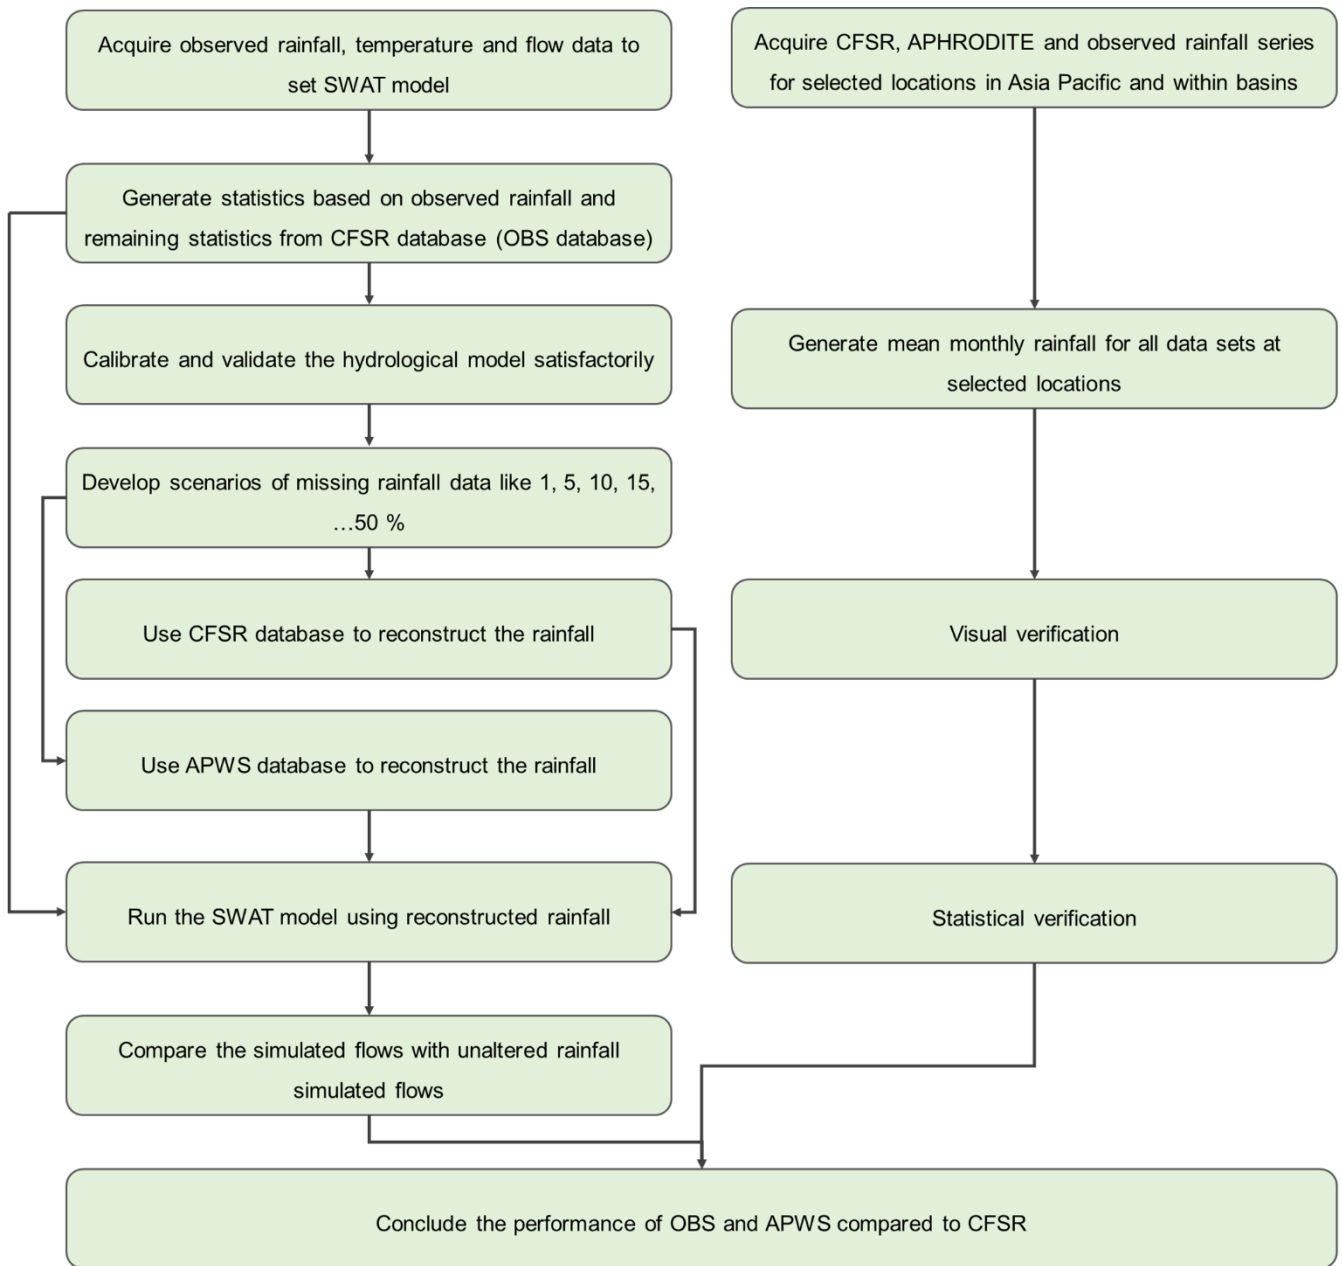

**Fig. 3 Performance evaluation of APWS for selected river basins of Asia**

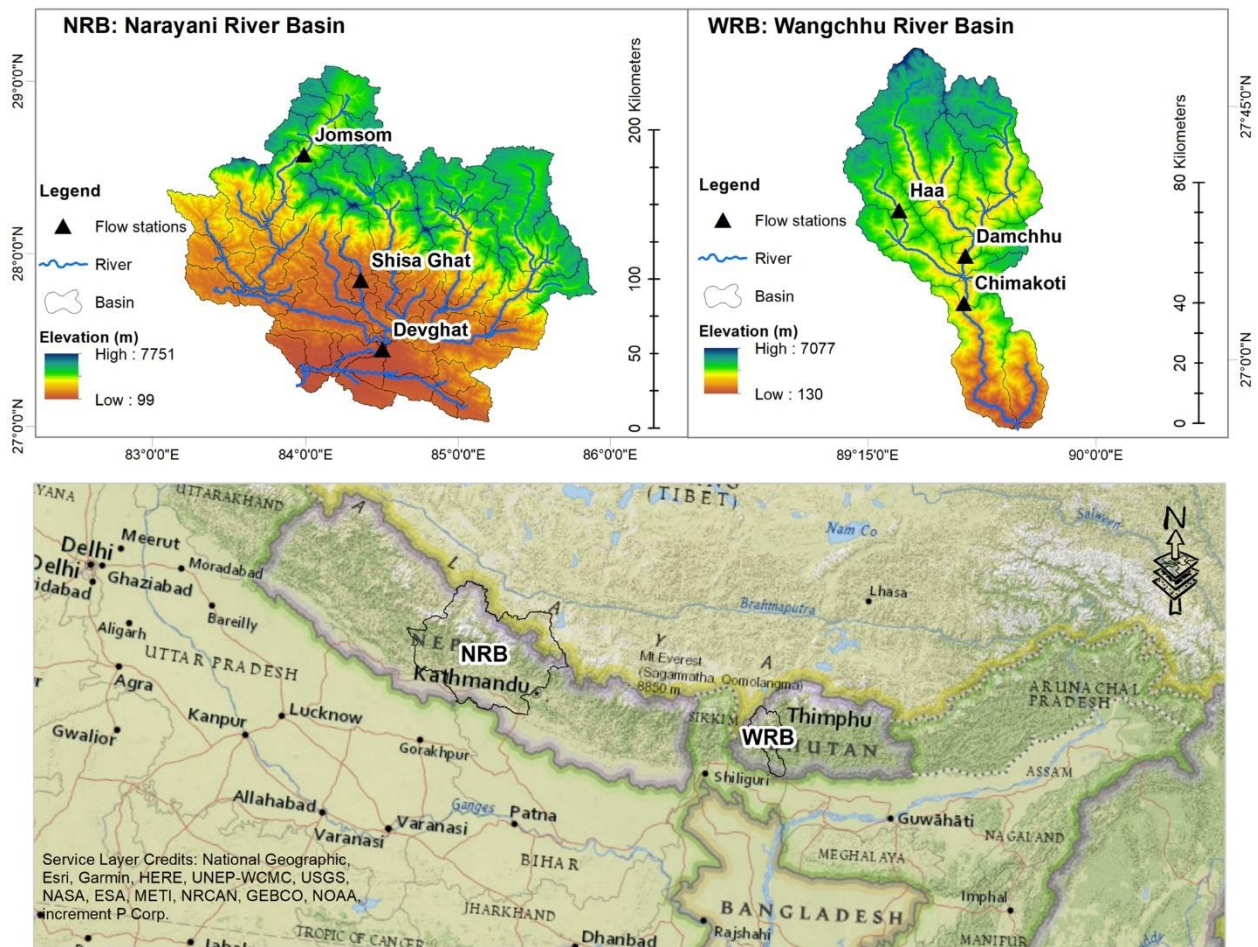

580 Fig. 4 Location of the test basins in Asia Pacific region and their elevational information

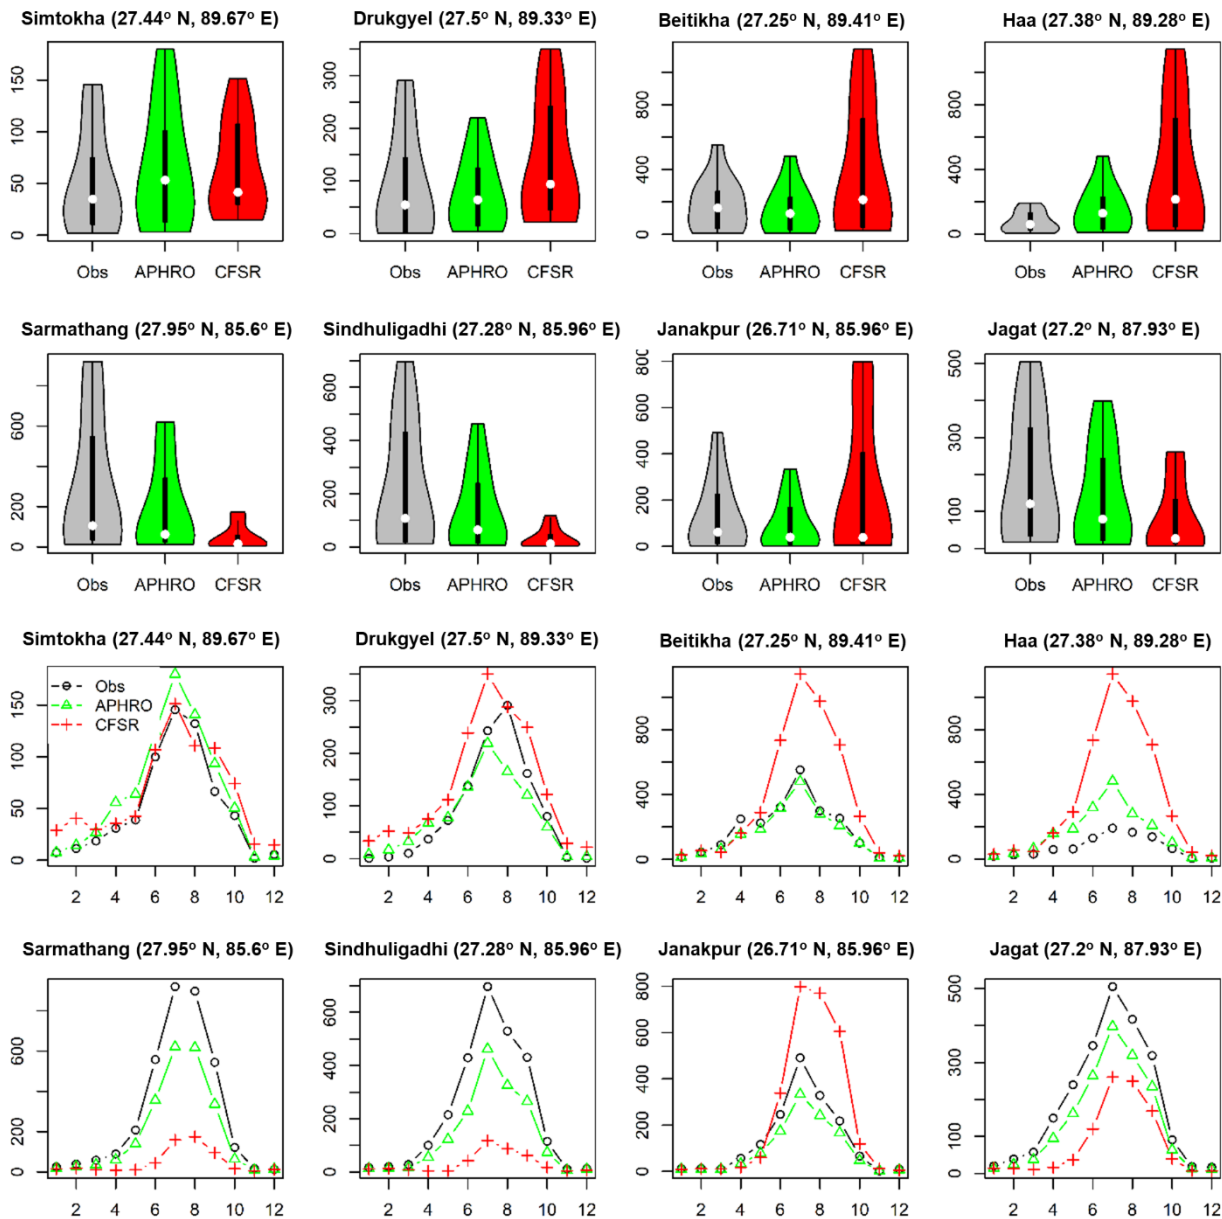

**Fig. 5** Comparison of distribution (top two rows; plotted over monthly rainfall time-series from years 1981-2007) and seasonality (bottom two rows) of mean monthly observed (Obs) rainfall (mm) with APHRODITE (APHRO) and CFSR rainfall series at selected stations of the study basins

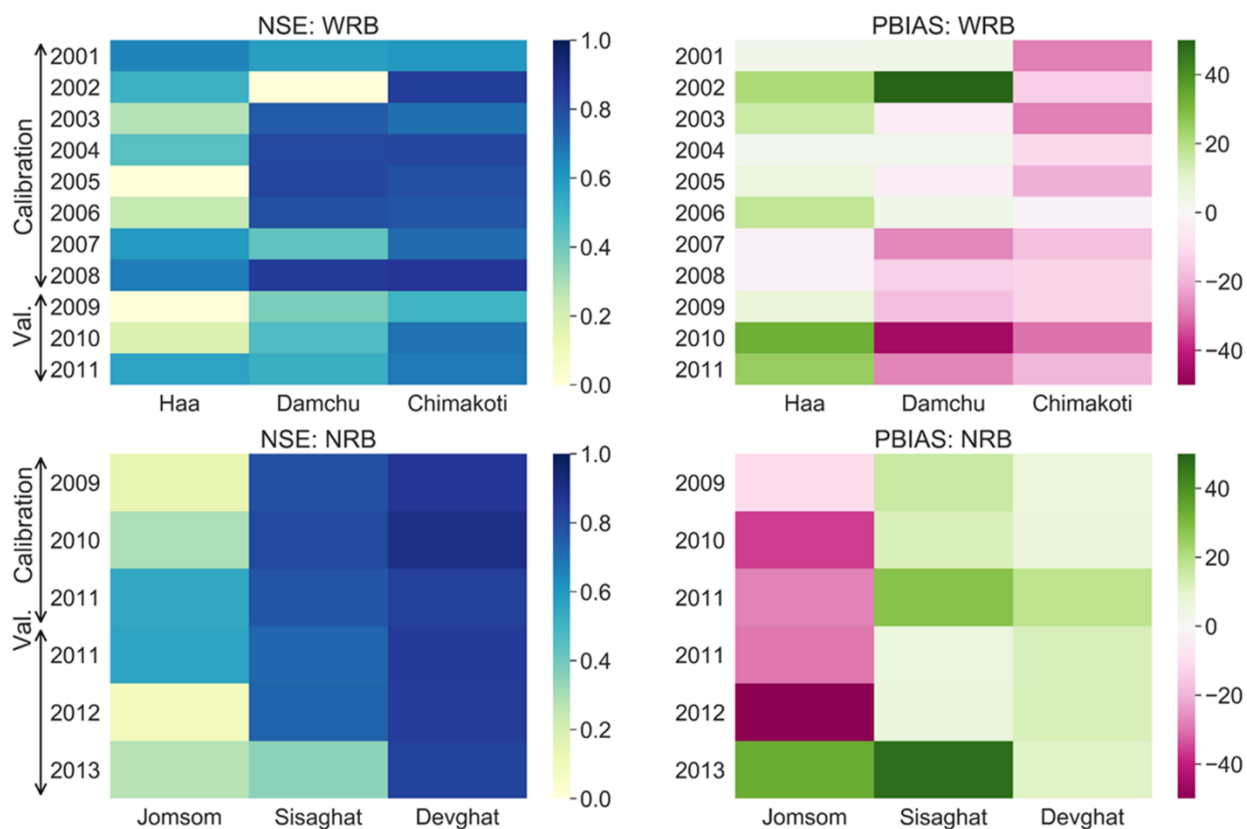

Fig. 6 NSE (left column) and PBIAS (right column) computed from daily simulated and observed flows for each year in top, middle and lower parts (left to right of each plot) in WRB (top row) and NRB (bottom row)

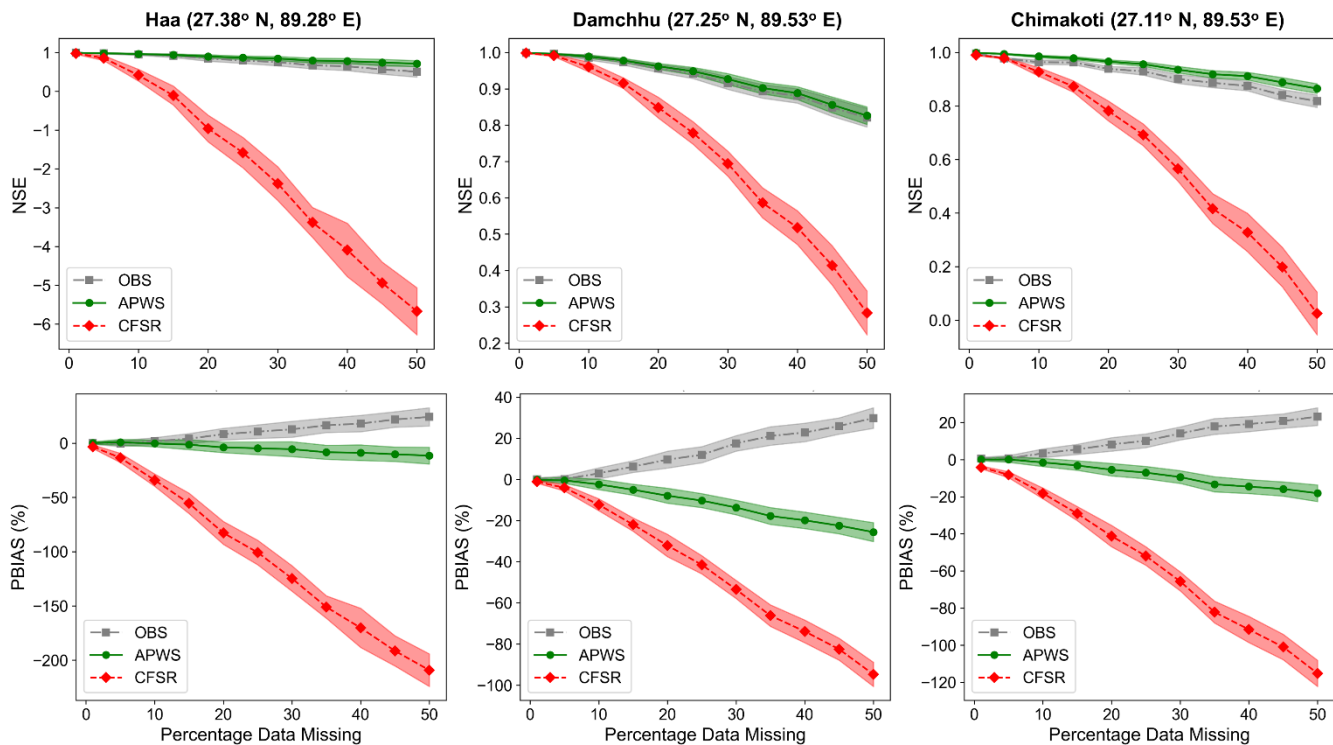

**Fig. 7 NSE and PBIAS in WRB computed using reference flows and simulated flows using weather statistics from OBS, APWS and CFSR for different scenarios of missing data (bands here represent the NSE and PBIAS values computed for 100 bootstraps) in WRB**

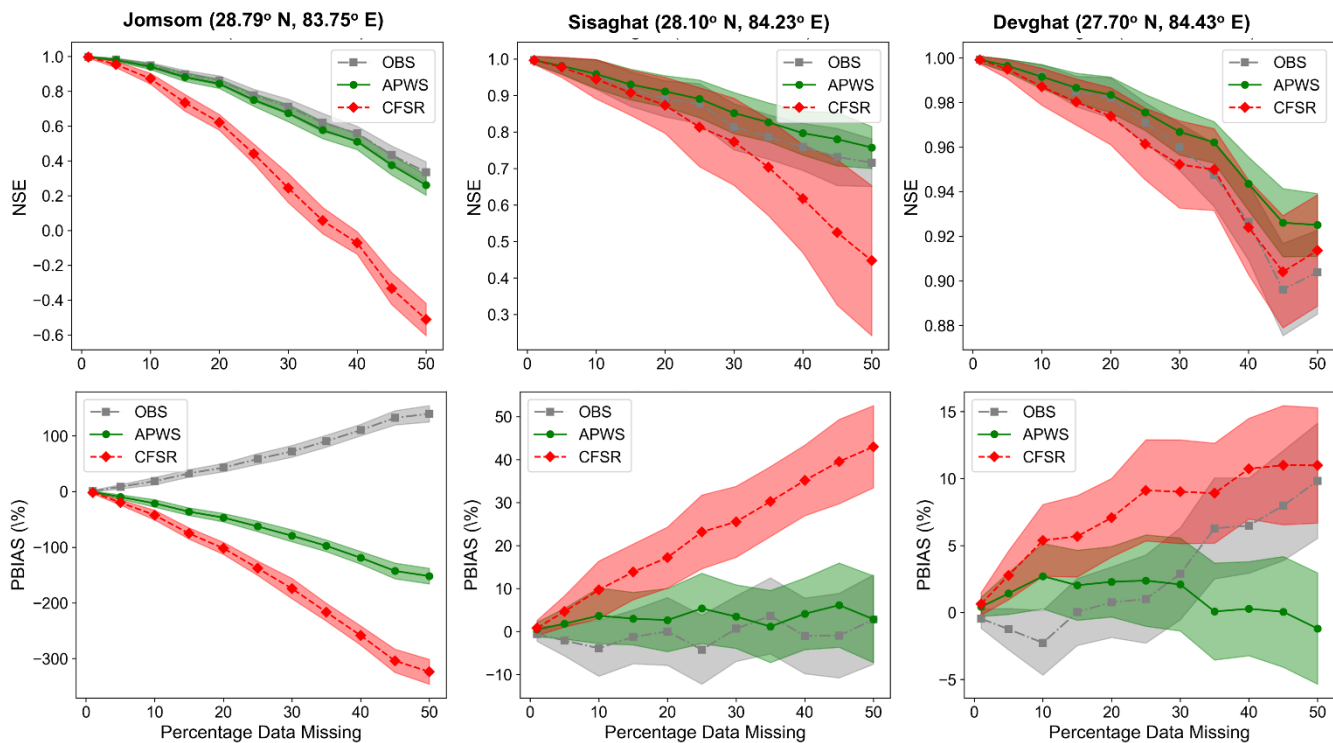

600 **Fig. 8 NSE and PBIAS in NRB computed using reference flows and simulated flows using weather statistics from OBS, APWS and CFSR for different scenarios of missing data (bands here represent the NSE and PBIAS values computed for 100 bootstraps) in NRB**

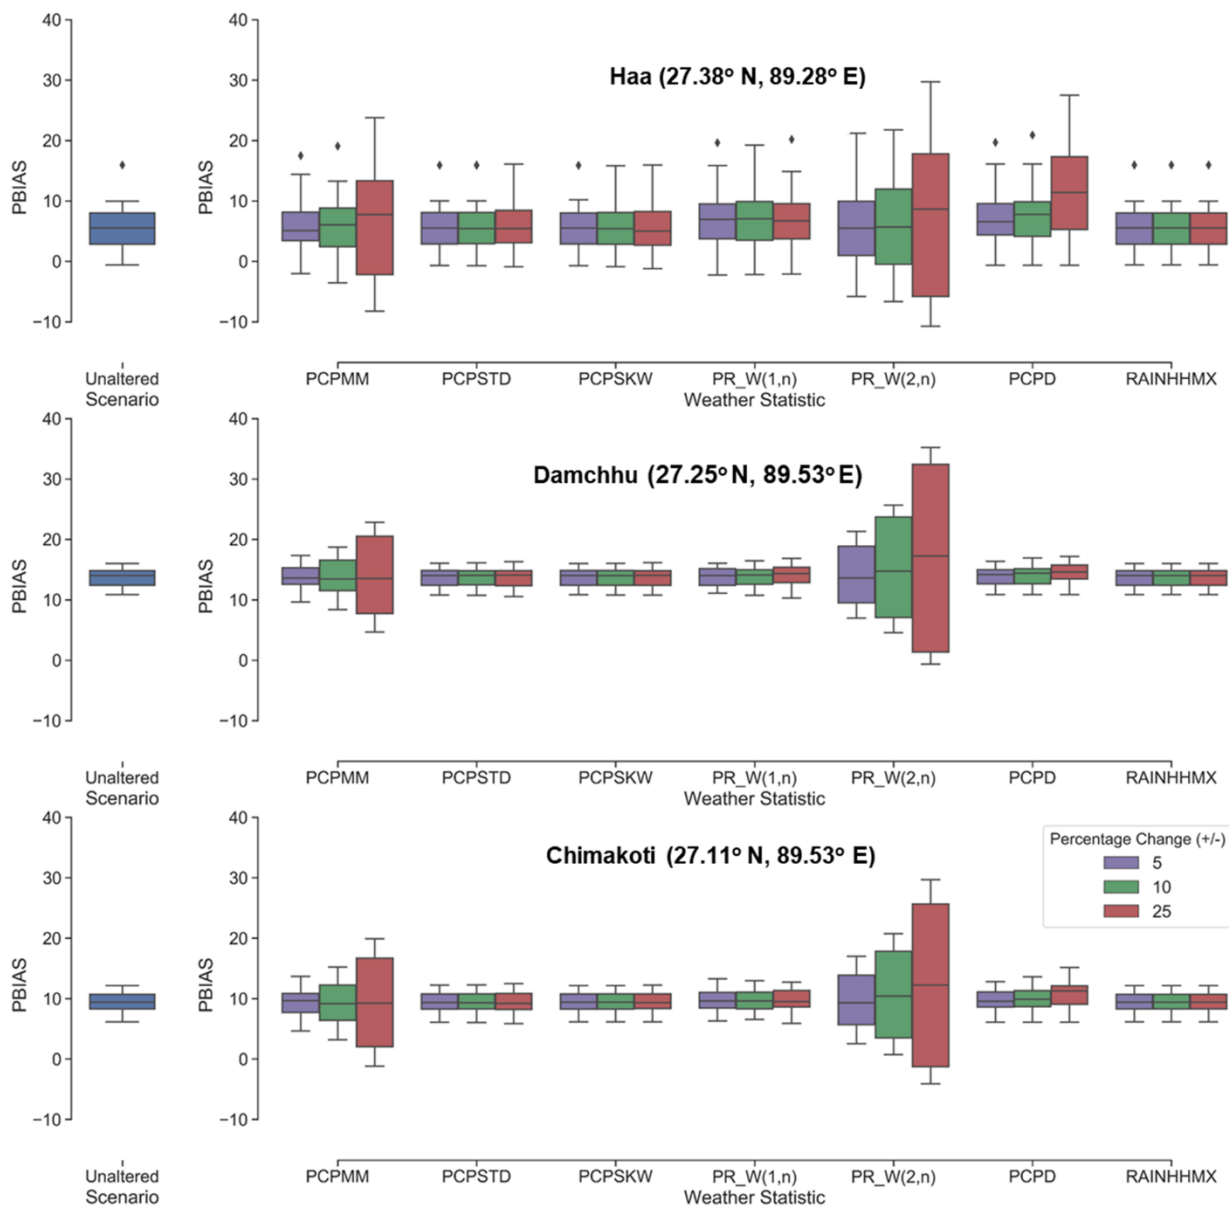

**Fig. 9 Sensitivity analysis of rainfall statistics in simulating daily flows at Haa, Damchhu and Chimakoti flow stations in the Wangchhu river basin, Bhutan**
